# Supplementary material
Source: Royal Society of Chemistry journal article supplement (doi:10.1039/d6nj01039c)
Supplement: d6nj01039c1.pdf [file d6nj01039c1.pdf]

## Supporting Information

### Combined Computational and Experimental Study on Designing

### Balanced Tetrazole-Based Energetic Materials

Hao Li<sup>b</sup>, Wen-Zhu Zu<sup>a</sup>, Xiao-Yu Fan,<sup>a</sup> Qian Zhang<sup>\*a</sup>, Yan Huang<sup>\*a</sup>

<sup>a</sup> School of Chemistry and Chemical Engineering Huanggang Normal University, Huanggang 438000, China

<sup>b</sup> Xi'an North Qinghua Electromechanical Group Co., Ltd., Xi'an 710025, China.

### content

|                                                                                                                                                                 |    |
|-----------------------------------------------------------------------------------------------------------------------------------------------------------------|----|
| <b>Part I DFT calculational study details</b> .....                                                                                                             | 3  |
| Fig. S1 Structure of series <b>I</b> designed molecules .....                                                                                                   | 3  |
| Fig. S2 Structure of series <b>II</b> designed molecules .....                                                                                                  | 3  |
| Fig. S3 Isodesmic reactions of series <b>I</b> designed molecules .....                                                                                         | 5  |
| Fig. S4 Isodesmic reactions of series <b>II</b> designed molecules .....                                                                                        | 7  |
| Table S1 Density of designed molecules (at M06-2X/6-311g+(2d,p) level).....                                                                                     | 7  |
| Fig. S5 HOMO-LUMO energy gaps of series <b>I</b> and series <b>II</b> at M06-2X/6-311g+(2d,p) level.....                                                        | 8  |
| Table S2 HOFs of designed molecules (at M06-2X/6-311g+(2d,p) level) .....                                                                                       | 8  |
| Table S3 Detonation properties of designed molecules (at M06-2X/6-311g+(2d,p) level) .....                                                                      | 8  |
| Fig. S6 Bond order of molecule <b>I-09</b> and <b>II</b> (at M06-2X/6-311g+(2d,p) level).....                                                                   | 9  |
| Fig. S7 LOL-pi color filling map of molecule <b>I-09</b> and <b>II</b> (at M06-2X/6-311g+(2d,p) level).....                                                     | 10 |
| Table S4 The HOMA method was employed to assess the aromaticity of each ring within <b>I-09</b> and <b>II</b> (at M06-2X/6-311g+(2d,p) level).....              | 11 |
| Table S5 The FiPC-NICS index <sup>a</sup> for <b>I-09</b> , <b>II</b> and each ring within both <b>I-09</b> and <b>II</b> (at M06-2X/6-311g+(2d,p) level) ..... | 12 |
| Table S6 Geometric optimization structure (at M06-2X/6-311g+(2d,p) level).....                                                                                  | 27 |
| <b>Part II Experimental study details</b> .....                                                                                                                 | 38 |
| Fig. S8 <sup>1</sup> H NMR (DMSO- <i>d</i> <sub>6</sub> , 500 MHz) map of derivative <b>A</b> .....                                                             | 39 |
| Fig. S9 <sup>13</sup> C NMR (DMSO- <i>d</i> <sub>6</sub> , 126 MHz) map of derivative <b>A</b> .....                                                            | 39 |
| Fig. S10 IR map of derivative <b>A</b> .....                                                                                                                    | 39 |
| Fig. S11 TG map (left) and DSC map (right) of derivative <b>A</b> .....                                                                                         | 39 |
| Fig. S12 <sup>1</sup> H NMR (DMSO- <i>d</i> <sub>6</sub> , 500 MHz) map of derivative <b>B</b> .....                                                            | 41 |
| Fig. S13 <sup>13</sup> C NMR (DMSO- <i>d</i> <sub>6</sub> , 126 MHz) map of derivative <b>B</b> .....                                                           | 41 |
| Fig. S14 LC-MS analysis of <b>Int-1</b> and derivative <b>B</b> .....                                                                                           | 42 |
| <b>Part III X-ray diffraction analysis details</b> .....                                                                                                        | 42 |
| Table S7 Crystal data and structure refinement for derivative <b>A</b> .....                                                                                    | 42 |
| Table S8 Bond lengths [Å] and angles [°] for derivative <b>A</b> .....                                                                                          | 43 |
| Table S9 Hydrogen bonds for derivative <b>A</b> [Å and °] .....                                                                                                 | 44 |
| <b>Part IV Calculation process of the HOFs for derivative A and B</b> .....                                                                                     | 45 |
| Fig. S15 Isodesmic reactions of derivative <b>A</b> and <b>B</b> .....                                                                                          | 45 |
| Table S10 Density of derivative <b>A</b> and <b>B</b> (at M06-2X/6-311g+(2d,p) level).....                                                                      | 45 |

**Table S11** Detonation properties of derivative **A** and **B** (at M06-2X/6-311g+(2d,p) level).....45

## Part I DFT calculational study details

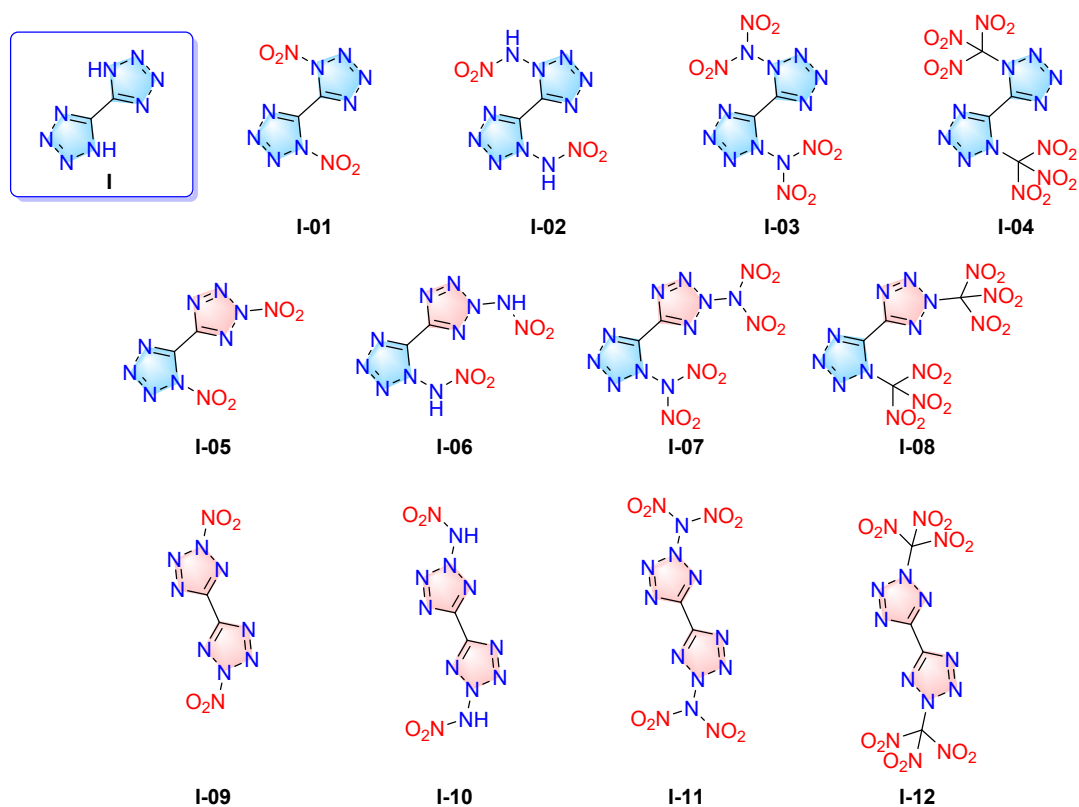

Fig. S1 Structure of series I designed molecules

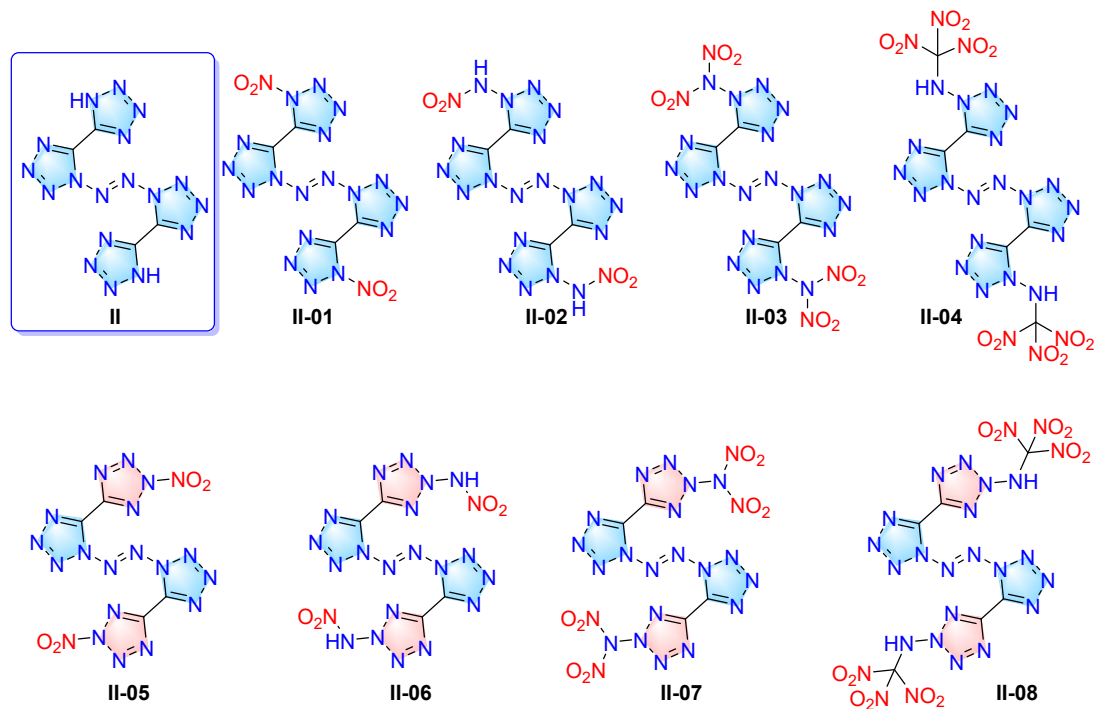

Fig. S2 Structure of series II designed molecules

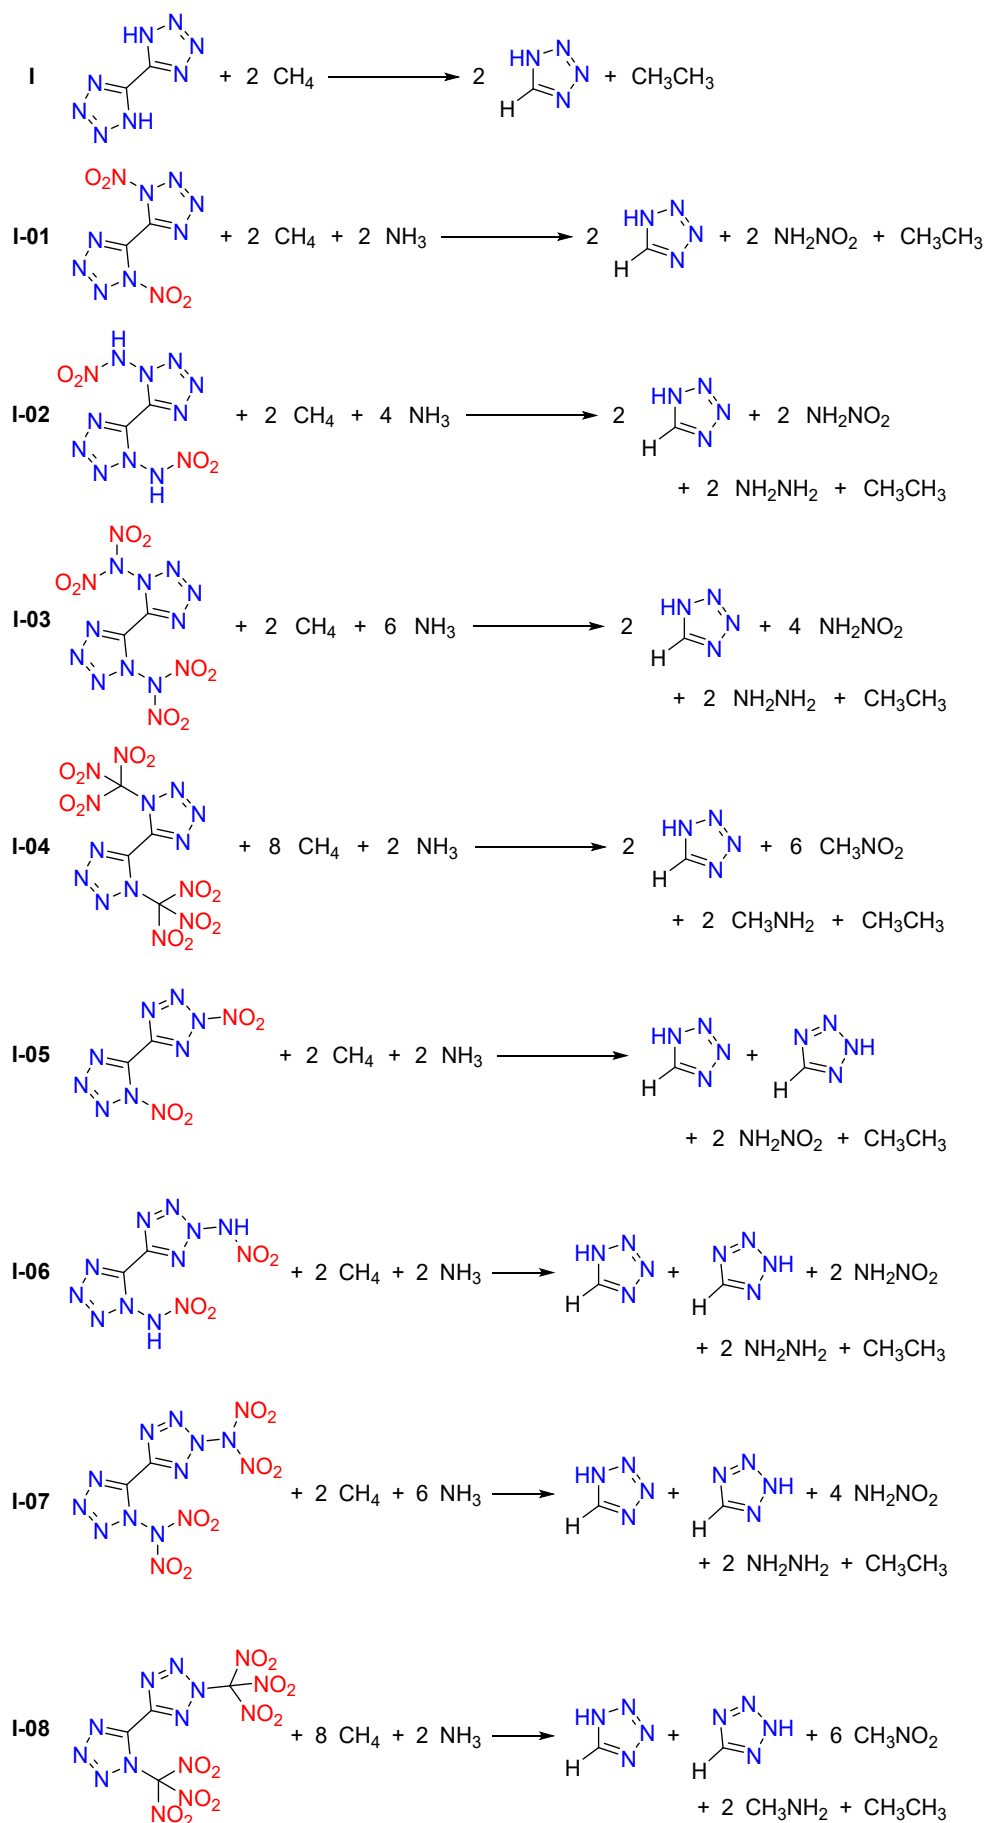

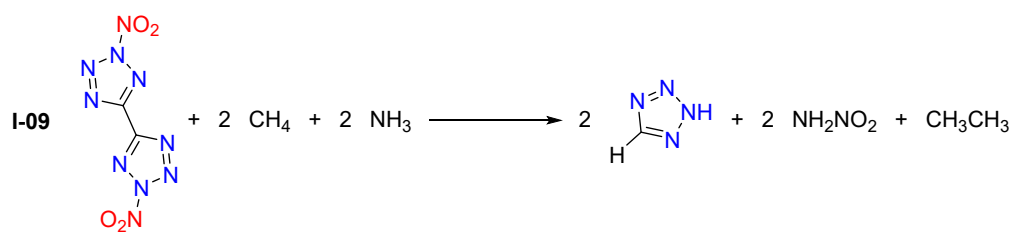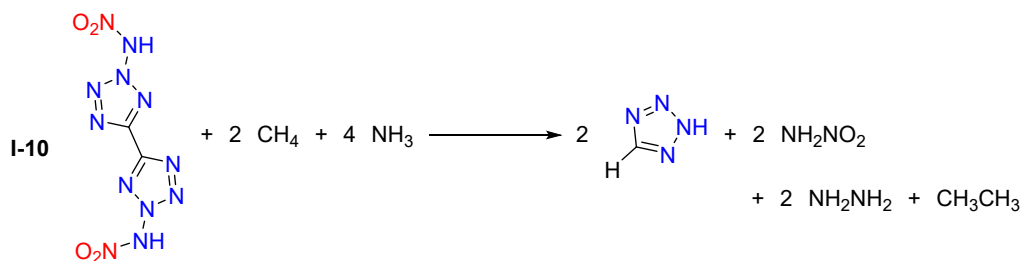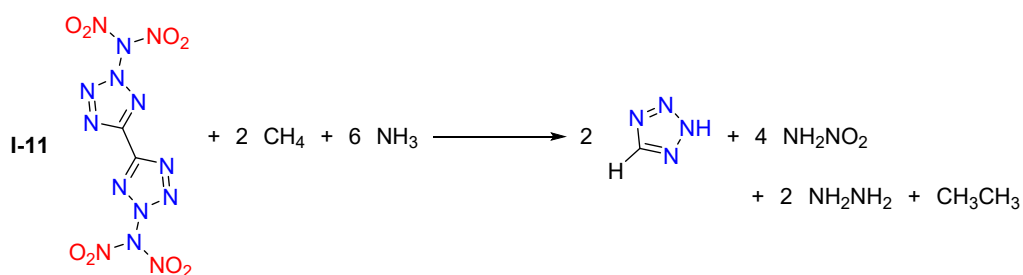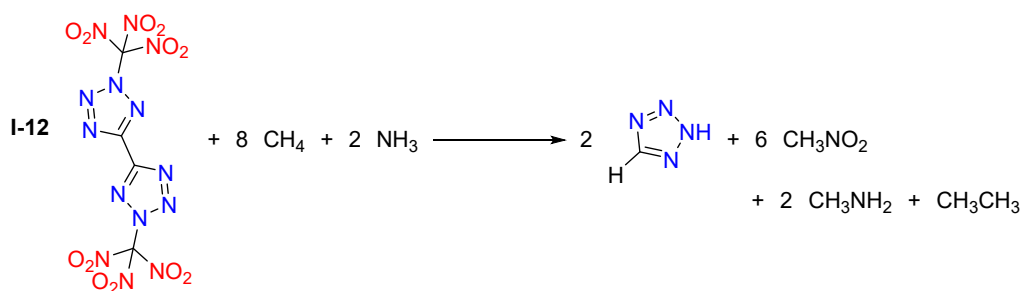

Fig. S3 Isodesmic reactions of series I designed molecules

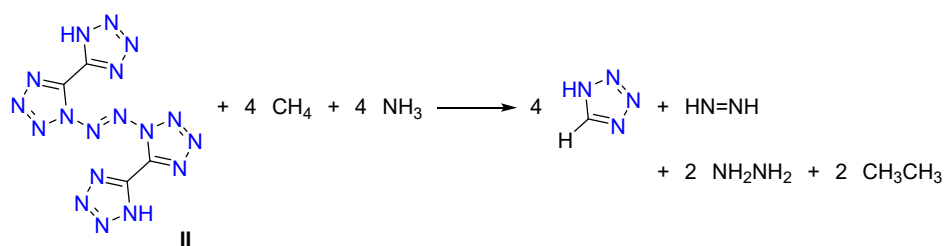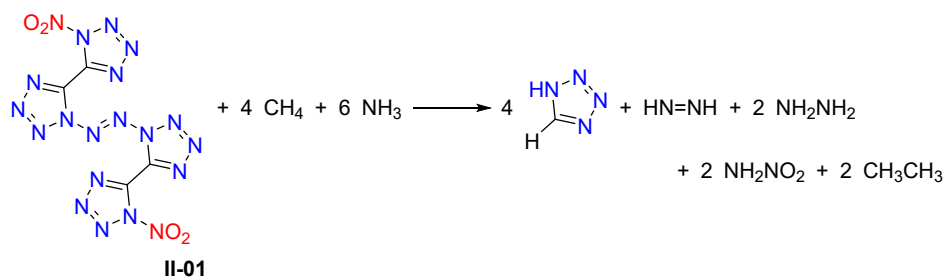

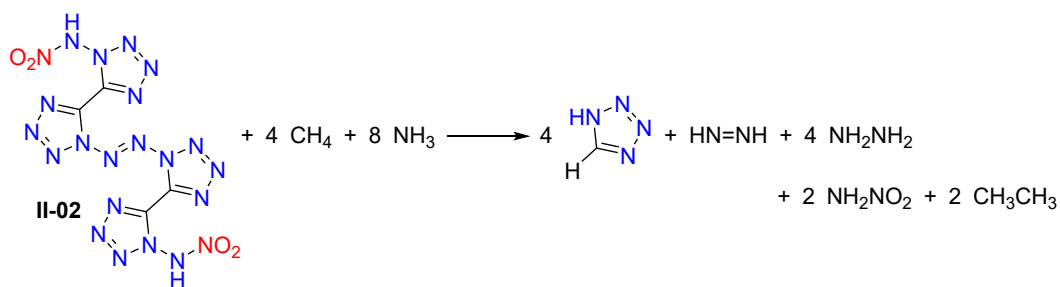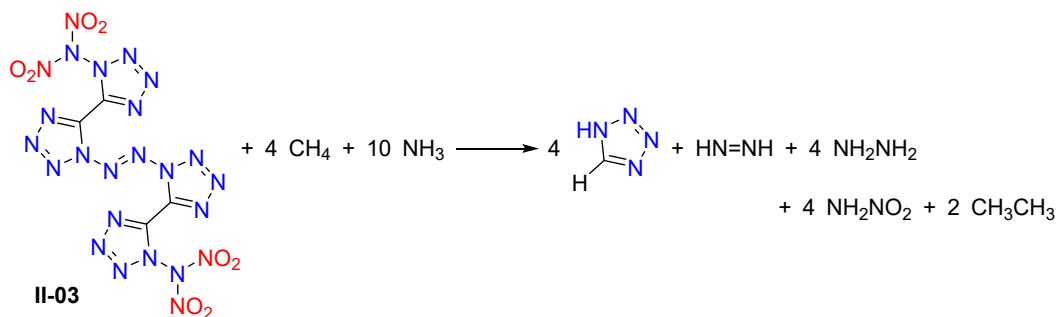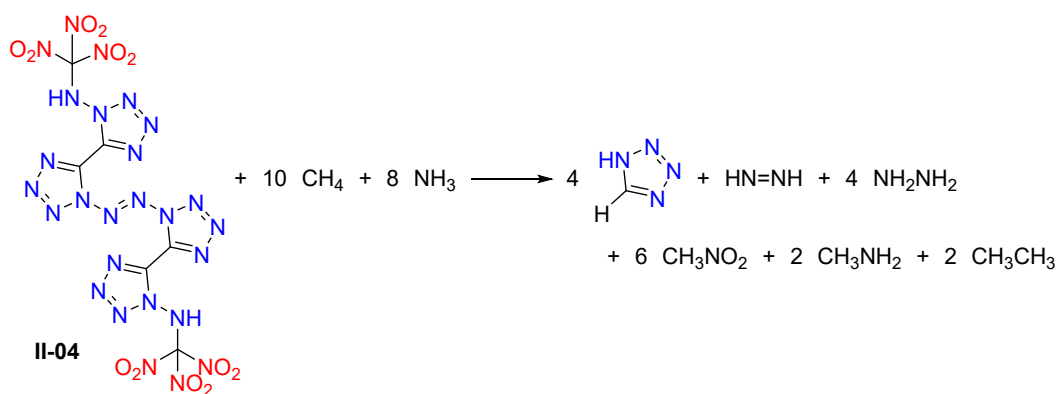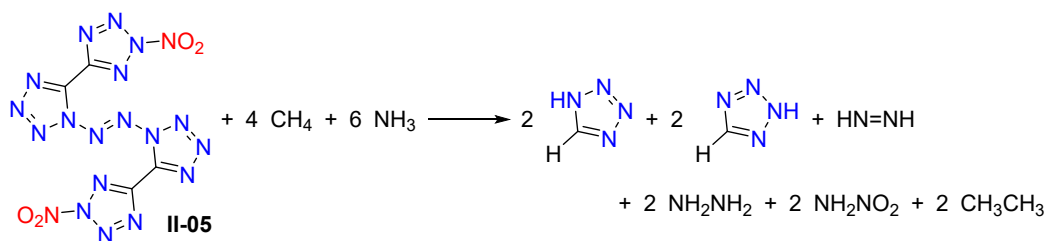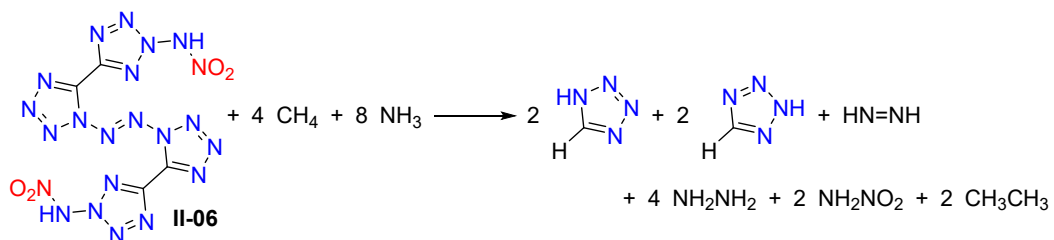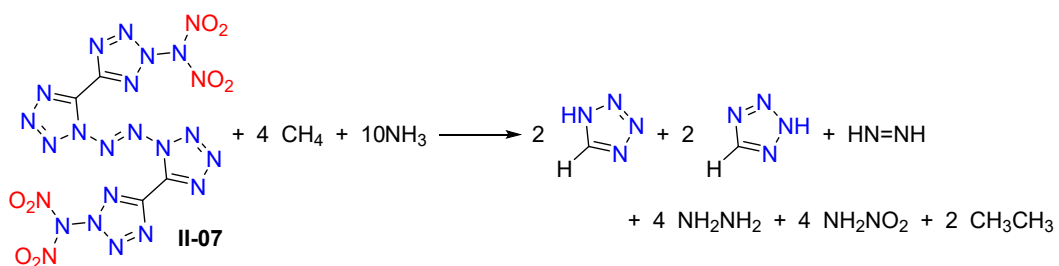

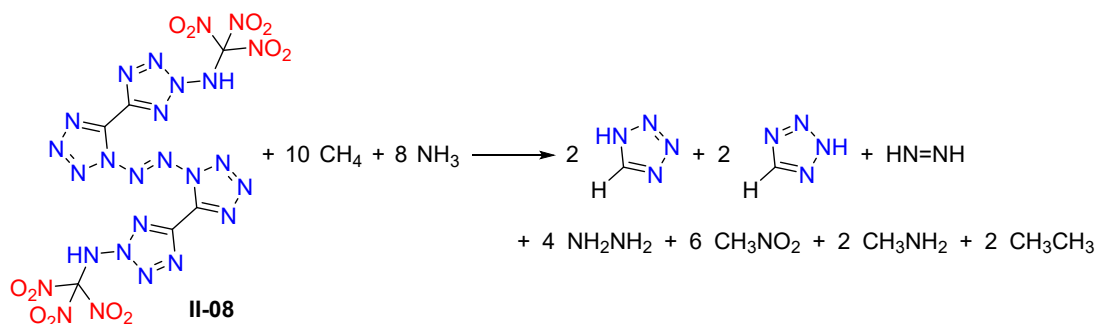

Fig. S4 Isodesmic reactions of series **II** designed molecules

Table S1 Density of designed molecules (at M06-2X/6-311g+(2d,p) level)

| No.          | Volume <sup>a</sup>           | Density <sup>b</sup>          | overall surface area <sup>c</sup> | $v\sigma_{tot}^2$ <sup>d</sup> | $\rho$ <sup>e</sup>           | $\Delta H_{vap}$ <sup>f</sup> | $\Delta H_{sub}$ <sup>g</sup> | $T_{bp}$ <sup>h</sup>         |
|--------------|-------------------------------|-------------------------------|-----------------------------------|--------------------------------|-------------------------------|-------------------------------|-------------------------------|-------------------------------|
| <b>I</b>     | 141.3<br>(140.6) <sup>i</sup> | 1.623<br>(1.631) <sup>i</sup> | 150.3<br>(150.1) <sup>i</sup>     | 41.64<br>(44.09) <sup>i</sup>  | 1.651<br>(1.665) <sup>i</sup> | 14.27<br>(14.42) <sup>i</sup> | 82.12<br>(83.33) <sup>i</sup> | 554.1<br>(559.7) <sup>i</sup> |
| <b>I-01</b>  | 201.9                         | 1.876                         | 202.9                             | 18.13                          | 1.818                         | 16.46                         | 87.72                         | 625.0                         |
| <b>I-02</b>  | 234.1                         | 1.831                         | 225.8                             | 18.81                          | 1.778                         | 18.20                         | 99.21                         | 690.2                         |
| <b>I-03</b>  | 290.7                         | <b>1.989</b>                  | 267.5                             | 11.78                          | 1.904                         | 20.18                         | 115.9                         | 774.0                         |
| <b>I-04</b>  | 357.9                         | <b>2.023</b>                  | 314.3                             | 5.98                           | 1.919                         | 22.19                         | 139.5                         | 869.4                         |
| <b>I-05</b>  | 202.3                         | 1.872                         | 207.4                             | 25.53                          | 1.835                         | 17.53                         | 95.26                         | 663.7                         |
| <b>I-06</b>  | 235.5                         | 1.820                         | 233.4                             | 45.31                          | 1.842                         | 20.96                         | 119.6                         | 790.7                         |
| <b>I-07</b>  | 294.3                         | <b>1.964</b>                  | 280.8                             | 30.32                          | 1.933                         | 22.97                         | 138.4                         | 879.6                         |
| <b>I-08</b>  | 363.3                         | <b>1.993</b>                  | 320.1                             | 11.73                          | 1.908                         | 23.45                         | 150.4                         | 917.8                         |
| <b>I-09</b>  | 203.1                         | 1.865                         | 210.7                             | 18.65                          | 1.809                         | 17.09                         | 91.73                         | 648.3                         |
| <b>I-10</b>  | 237.8                         | 1.803                         | 242.6                             | 27.36                          | 1.776                         | 20.20                         | 114.2                         | 766.0                         |
| <b>I-11</b>  | 298.0                         | <b>1.940</b>                  | 293.7                             | 13.38                          | 1.863                         | 22.06                         | 133.9                         | 853.4                         |
| <b>I-12</b>  | 365.6                         | <b>1.981</b>                  | 341.1                             | 6.66                           | 1.882                         | 23.89                         | 160.0                         | 947.1                         |
| <b>II</b>    | 288.8                         | 1.738                         | 280.3                             | 50.13                          | 1.780                         | 24.40                         | 148.9                         | 930.7                         |
| <b>II-01</b> | 349.7                         | 1.862                         | 334.8                             | 23.66                          | 1.821                         | 25.65                         | 171.0                         | 1006                          |
| <b>II-02</b> | 381.3                         | 1.839                         | 349.3                             | 30.10                          | 1.817                         | 27.07                         | 186.4                         | 1066                          |
| <b>II-03</b> | 442.1                         | <b>1.924</b>                  | 400.8                             | 23.19                          | 1.876                         | 29.28                         | 224.92                        | 1185                          |
| <b>II-04</b> | 503.9                         | <b>1.978</b>                  | 430.8                             | 15.88                          | 1.905                         | 30.07                         | 247.0                         | 1239                          |
| <b>II-05</b> | 351.9                         | 1.851                         | 345.7                             | 27.99                          | 1.822                         | 26.68                         | 182.3                         | 1050                          |
| <b>II-06</b> | 386.6                         | 1.814                         | 377.4                             | 35.18                          | 1.808                         | 29.05                         | 212.2                         | 1158                          |
| <b>II-07</b> | 446.6                         | <b>1.904</b>                  | 428.2                             | 29.68                          | 1.876                         | 31.30                         | 254.6                         | 1281                          |
| <b>II-08</b> | 513.7                         | <b>1.940</b>                  | 475.5                             | 22.45                          | 1.889                         | 33.01                         | 297.4                         | 1387                          |

<sup>a</sup> Angstrom<sup>3</sup>; <sup>b</sup> Estimated density according to mass and volume, g/cm<sup>3</sup>; <sup>c</sup> Angstrom<sup>2</sup>; <sup>d</sup> Product of  $\sigma_{tot}^2$  and  $\nu$ , (kcal/mol)<sup>2</sup>; <sup>e</sup>  $\rho = \alpha \frac{M}{V_m} + \beta (v\sigma_{tot}^2) + \gamma$ ,  $\alpha = 0.9183$ ,  $\beta = 0.0028$ ,  $\gamma = 0.0443$  (ref: *Mol. Phys.* 2009, **107**, 2095-2101.); <sup>f</sup>  $\Delta H_{vap} = a\sqrt{A} + b\sqrt{v\sigma_{tot}^2} + c$  (kcal/mol),  $a = 2.130$ ,  $b = 0.930$ ,  $c = -17.844$  (ref: *J. Phys. Chem. A.* 2006, **110**(3), 1005-1013.); <sup>g</sup>  $\Delta H_{sub} = aA^2 + b\sqrt{v\sigma_{tot}^2} + c$  (kJ/mol),  $a = 0.000267$ ,  $b = 1.650087$ ,  $c = 2.966078$ ; <sup>h</sup>  $T_{bp} = \alpha A + \beta\sqrt{v\sigma_{tot}^2} + \gamma$  (K),  $\alpha = 2.736$ ,  $\beta = 33.31$ ,  $\gamma = -72.05$  (ref: *J. Phys. Chem.* 1993, **97**(37), 9369-9373.); <sup>i</sup> calculated at MP2/6-311g+(2d,p) level

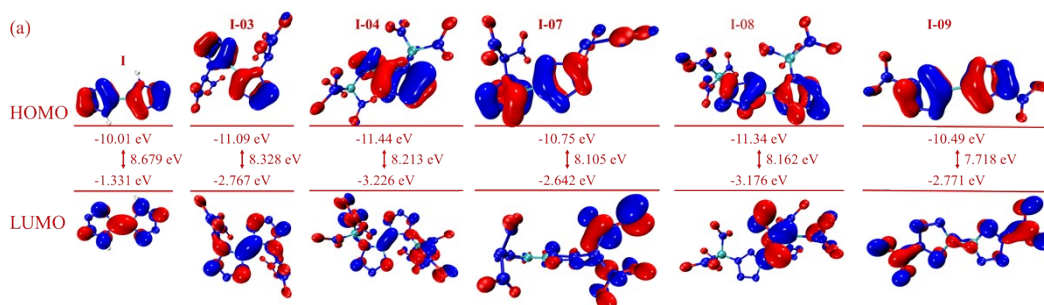

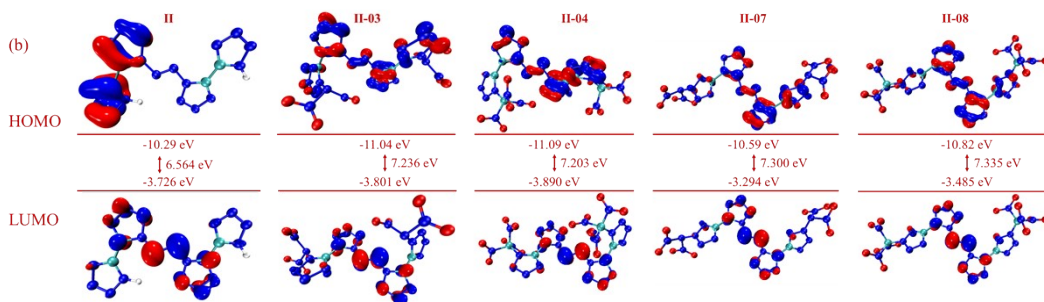

Fig. S5 HOMO-LUMO energy gaps of series I and series II at M06-2X/6-311g+(2d,p) level

Based on the designed isodesmic reactions (Fig. S3 and S4), the heat of formation (HOFs) for the designed molecules could be determined using the following formula:

$$\Delta H_f^0(\text{gas}, 298 \text{ K}) = \sum \Delta H_{f,p}^0(\text{gas}, 298 \text{ K}) - \sum \Delta H_{f,R}^0(\text{gas}, 298 \text{ K}) = \Delta E_0 + \Delta E_{ZPE} + \Delta H_T + \Delta nRT$$

(eq. 1)

$$\Delta H_f^0(\text{solid}, 298 \text{ K}) = \Delta H_f^0(\text{gas}, 298 \text{ K}) - \Delta H_{\text{sub}} \quad (\text{eq. 2})$$

Table S2 HOFs of designed molecules (at M06-2X/6-311g+(2d,p) level)

| No.          | $E_{ZPE}^a$ | $\Delta H_T^0$ | $E_0^a$ | $\Delta H_f^0(\text{gas})_b$ | $\Delta H_f^0(\text{solid})_b$ | $h_{50}^c$                    |
|--------------|-------------|----------------|---------|------------------------------|--------------------------------|-------------------------------|
| <b>I</b>     | 0.0761      | 0.0838         | -515.2  | 707.4                        | 625.3                          | 25.50<br>(24.96) <sup>d</sup> |
| <b>I-01</b>  | 0.0791      | 0.0921         | -924.1  | 791.4                        | 703.7                          | 20.63                         |
| <b>I-02</b>  | 0.1153      | 0.1300         | -1035   | 984.0                        | 884.8                          | 10.80                         |
| <b>I-03</b>  | 0.1173      | 0.1371         | -1444   | 1068                         | 952.1                          | 25.08                         |
| <b>I-04</b>  | 0.1466      | 0.1710         | -1821   | 713.8                        | 574.3                          | 16.84                         |
| <b>I-05</b>  | 0.0795      | 0.0924         | -924.1  | 748.0                        | 652.7                          | 28.99                         |
| <b>I-06</b>  | 0.1155      | 0.1301         | -1035   | 848.8                        | 729.2                          | 25.61                         |
| <b>I-07</b>  | 0.1173      | 0.1372         | -1444   | 1025                         | 886.3                          | 47.91                         |
| <b>I-08</b>  | 0.1465      | 0.1720         | -1821   | 670.4                        | 520.0                          | 24.51                         |
| <b>I-09</b>  | 0.0797      | 0.0926         | -924.1  | 704.6                        | 612.9                          | 25.16                         |
| <b>I-10</b>  | 0.1155      | 0.1303         | -1035   | 897.2                        | 783.1                          | 17.56                         |
| <b>I-11</b>  | 0.1175      | 0.1374         | -1444   | 981.2                        | 847.3                          | 28.72                         |
| <b>I-12</b>  | 0.1467      | 0.1724         | -1821   | 627.0                        | 467.0                          | 12.23                         |
| <b>II</b>    | 0.1401      | 0.1567         | -1139   | 1900                         | 1751                           | 28.72                         |
| <b>II-01</b> | 0.1435      | 0.1653         | -1548   | 1984                         | 1813                           | 24.74                         |
| <b>II-02</b> | 0.1792      | 0.2028         | -1658   | 2176                         | 1990                           | 20.67                         |
| <b>II-03</b> | 0.1808      | 0.2098         | -2067   | 2260                         | 2035                           | 26.78                         |
| <b>II-04</b> | 0.2106      | 0.2446         | -2444   | 2099                         | 1852                           | 23.49                         |
| <b>II-05</b> | 0.1437      | 0.1656         | -1548   | 1897                         | 1715                           | 33.16                         |
| <b>II-06</b> | 0.1793      | 0.2031         | -1658   | 2090                         | 1877                           | 27.39                         |
| <b>II-07</b> | 0.1813      | 0.2104         | -2067   | 2174                         | 1919                           | 42.14                         |
| <b>II-08</b> | 0.2107      | 0.2414         | -2444   | 1609                         | 1311                           | 30.64                         |

<sup>a</sup> a.u.; <sup>b</sup> kJ/mol; <sup>c</sup>  $h_{50} = \alpha \sigma_+^2 + \beta v + \gamma$  (cm),  $\alpha = -0.0064$ ,  $\beta = 241.42$ ,  $\gamma = -3.43$ ,

$v = \frac{\sigma_+^2 \sigma_-^2}{(\sigma_+^2 + \sigma_-^2)^2}$  (ref: *J. Mol. Model.* 2010, **16**, 895-901); <sup>d</sup> calculated at MP2/6-311g+(2d,p) level

Table S3 Detonation properties of designed molecules (at M06-2X/6-311g+(2d,p) level)

| No.         | $\rho^a$ | $\Delta H_f^0$ | OB% <sup>c</sup> | $Q^d$ | $D^e$ | $P^f$ | $h_{50}^g$ |
|-------------|----------|----------------|------------------|-------|-------|-------|------------|
| <b>I</b>    | 1.623    | 625.3          | 34.76            | 4850  | 7.323 | 22.31 | 25.50      |
| <b>I-01</b> | 1.876    | 703.7          | 40.38            | 5760  | 8.792 | 35.14 | 20.63      |
| <b>I-02</b> | 1.831    | 884.8          | 43.39            | 6645  | 9.127 | 37.32 | 10.80      |

|              |                               |       |       |      |       |       |       |
|--------------|-------------------------------|-------|-------|------|-------|-------|-------|
| <b>I-03</b>  | 1.989                         | 952.1 | 45.96 | 7250 | 10.02 | 47.15 | 25.08 |
| <b>I-04</b>  | 2.023                         | 574.3 | 22.01 | 6724 | 9.778 | 45.36 | 16.84 |
| <b>I-05</b>  | 1.872                         | 652.7 | 42.09 | 6306 | 9.045 | 37.14 | 28.99 |
| <b>I-06</b>  | 1.820                         | 729.2 | 43.39 | 6043 | 8.876 | 35.17 | 25.61 |
| <b>I-07</b>  | 1.964                         | 886.3 | 45.96 | 7061 | 9.864 | 45.40 | 47.91 |
| <b>I-08</b>  | 1.993                         | 520.0 | 22.01 | 6600 | 9.628 | 43.61 | 24.51 |
| <b>I-09</b>  | 1.865                         | 612.9 | 42.09 | 6132 | 8.959 | 36.36 | 25.16 |
| <b>I-10</b>  | 1.803                         | 783.1 | 43.39 | 6251 | 8.892 | 35.10 | 17.56 |
| <b>I-11</b>  | 1.940                         | 847.3 | 45.96 | 6949 | 9.737 | 43.93 | 28.72 |
| <b>I-12</b>  | 1.981                         | 467.0 | 22.01 | 6478 | 9.541 | 42.68 | 12.23 |
| <b>II</b>    | 1.738                         | 1751  | 47.65 | 5937 | 8.098 | 28.48 | 28.72 |
| <b>II-01</b> | 1.862                         | 1813  | 48.96 | 6622 | 8.972 | 36.43 | 24.74 |
| <b>II-02</b> | 1.839                         | 1990  | 49.26 | 6677 | 8.986 | 36.28 | 20.67 |
| <b>II-03</b> | 1.924                         | 2035  | 49.98 | 7040 | 9.522 | 41.81 | 26.78 |
| <b>II-04</b> | 1.978                         | 1852  | 33.00 | 6749 | 9.566 | 42.87 | 23.49 |
| <b>II-05</b> | 1.851                         | 1715  | 48.96 | 6372 | 8.848 | 35.30 | 33.16 |
| <b>II-06</b> | 1.814                         | 1877  | 49.26 | 6411 | 8.809 | 34.58 | 27.39 |
| <b>II-07</b> | 1.904                         | 1919  | 49.98 | 6813 | 9.376 | 40.31 | 42.14 |
| <b>II-08</b> | 1.940                         | 1311  | 33.00 | 5892 | 9.119 | 38.54 | 30.64 |
| <b>RDX</b>   | 1.758<br>(1.80 <sup>h</sup> ) | 96.34 | 21.62 | 6351 | 8.693 | 33.04 | 34.01 |
| <b>HMX</b>   | 1.809<br>(1.91 <sup>h</sup> ) | 74.90 | 21.62 | 6171 | 8.805 | 34.49 | 29.78 |

<sup>a</sup> density (g/cm<sup>3</sup>); <sup>b</sup> solid phase heat of formation (kJ/mol); <sup>c</sup> oxygen balance; <sup>d</sup> explosion heat (J/g); <sup>e</sup> detonation velocity (km/s); <sup>f</sup> explosion pressure (GPa); <sup>g</sup> impact sensitivity (cm); <sup>h</sup> ref: *Propellants Explos. Pyrotech.*, 2014, **39**(3), 383-389; *Combust. Explos. Shock Waves*, 2009, **45**(1), 78-87.

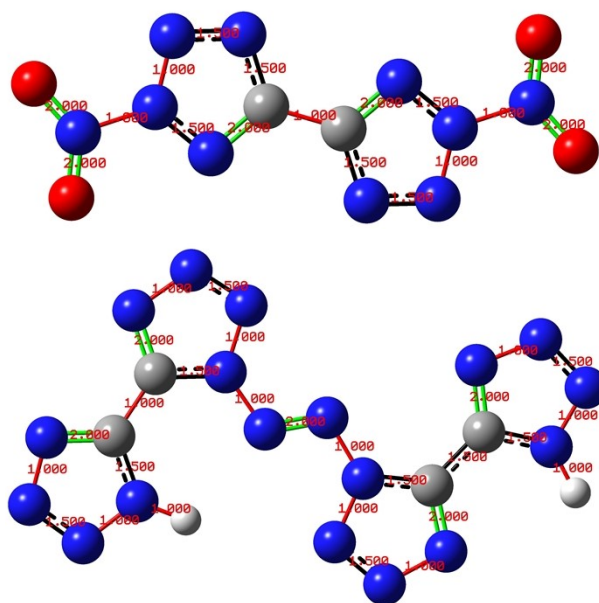

Fig. S6 Bond order of molecule **I-09** and **II** (at M06-2X/6-311g+(2d,p) level)

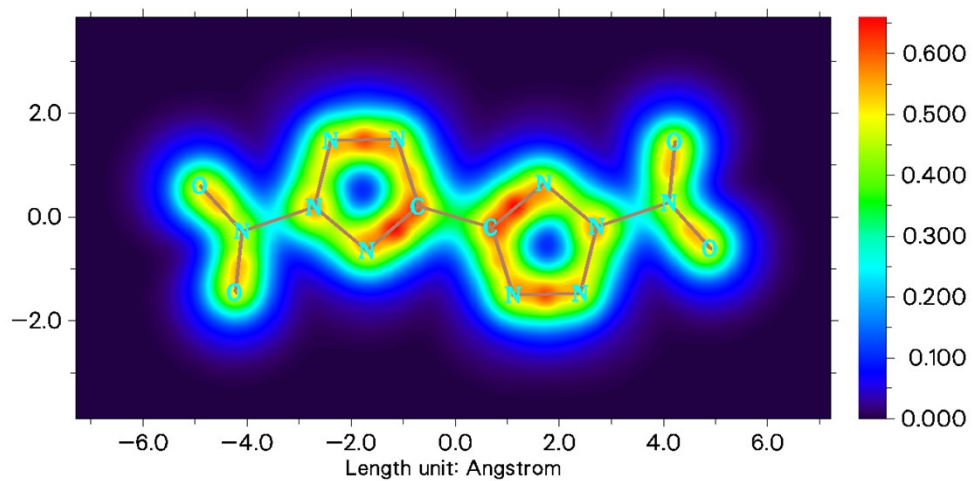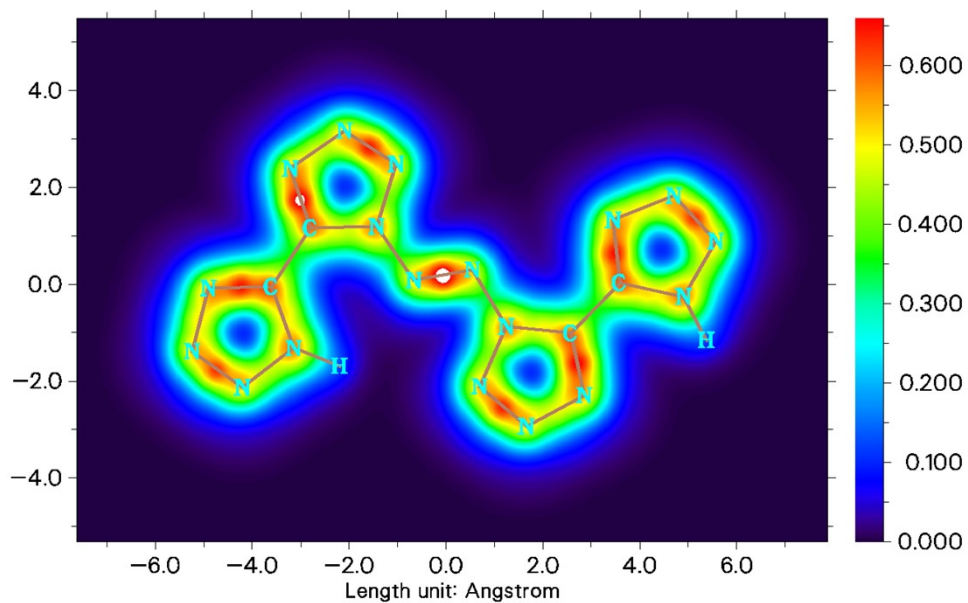

Fig. S7 LOL-pi color filling map of molecule **I-09** and **II** (at M06-2X/6-311g+(2d,p) level)

Table S4 The HOMA method was employed to assess the aromaticity of each ring within **I-09** and **II** (at M06-2X/6-311g+(2d,p) level)

| No.                                                                                                  | Atom pair              | Contribution | Bond length(Angstrom) |  |
|------------------------------------------------------------------------------------------------------|------------------------|--------------|-----------------------|--|
| 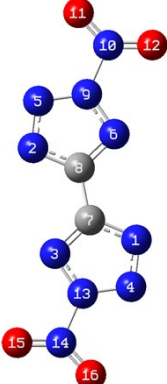 <p><b>I-09</b></p> | 1(N) -- 4(N)           | -0.012506    | 1.287096              |  |
|                                                                                                      | 4(N) -- 13(N)          | -0.004631    | 1.322329              |  |
|                                                                                                      | 13(N) -- 3(N)          | -0.000107    | 1.311022              |  |
|                                                                                                      | 3(N) -- 7(C)           | -0.006149    | 1.315869              |  |
|                                                                                                      | 7(C) -- 1(N)           | -0.016834    | 1.364001              |  |
|                                                                                                      | HOMA value is 0.959774 |              |                       |  |
|                                                                                                      | 2(N) -- 8(C)           | -0.016859    | 1.364022              |  |
|                                                                                                      | 8(C) -- 6(N)           | -0.006161    | 1.315851              |  |
|                                                                                                      | 6(N) -- 9(N)           | -0.000107    | 1.311026              |  |
|                                                                                                      | 9(N) -- 5(N)           | -0.004649    | 1.322356              |  |
| 5(N) -- 2(N)                                                                                         | -0.012538              | 1.287068     |                       |  |
| HOMA value is 0.959686                                                                               |                        |              |                       |  |
|  <p><b>II</b></p>  | 13(C) -- 21(N)         | -0.002726    | 1.346073              |  |
|                                                                                                      | 21(N) -- 24(N)         | -0.012638    | 1.331019              |  |
|                                                                                                      | 24(N) -- 23(N)         | -0.016444    | 1.283883              |  |
|                                                                                                      | 23(N) -- 15(N)         | -0.033864    | 1.345044              |  |
|                                                                                                      | 15(N) -- 13(C)         | -0.010161    | 1.310692              |  |
|                                                                                                      | HOMA value is 0.924168 |              |                       |  |
|                                                                                                      | 12(C) -- 10(N)         | -0.014015    | 1.361373              |  |
|                                                                                                      | 10(N) -- 8(N)          | -0.050263    | 1.352912              |  |
|                                                                                                      | 8(N) -- 7(N)           | -0.040576    | 1.269545              |  |
|                                                                                                      | 7(N) -- 6(N)           | -0.085024    | 1.366113              |  |
|                                                                                                      | 6(N) -- 12(C)          | -0.021428    | 1.300153              |  |
|                                                                                                      | HOMA value is 0.788694 |              |                       |  |
|                                                                                                      | 9(N) -- 5(N)           | -0.046091    | 1.351051              |  |
|                                                                                                      | 5(N) -- 4(N)           | -0.036027    | 1.271823              |  |
|                                                                                                      | 4(N) -- 3(N)           | -0.057520    | 1.355976              |  |
| 3(N) -- 11(C)                                                                                        | -0.014139              | 1.306506     |                       |  |
| 11(C) -- 9(N)                                                                                        | -0.005376              | 1.350953     |                       |  |
| HOMA value is 0.840847                                                                               |                        |              |                       |  |
| 14(C) -- 16(N)                                                                                       | -0.011807              | 1.308876     |                       |  |
| 16(N) -- 17(N)                                                                                       | -0.042106              | 1.349191     |                       |  |
| 17(N) -- 18(N)                                                                                       | -0.016784              | 1.283625     |                       |  |
| 18(N) -- 19(N)                                                                                       | -0.011438              | 1.329948     |                       |  |
| 19(N) -- 14(C)                                                                                       | -0.001070              | 1.341562     |                       |  |
| HOMA value is 0.916796                                                                               |                        |              |                       |  |

Table S5 The FiPC-NICS index <sup>a</sup> for **I-09**, **II** and each ring within both **I-09** and **II** (at M06-2X/6-311g+(2d,p) level)

| No. | FiPC-NICS.txt <sup>b</sup>                     |           |            |
|-----|------------------------------------------------|-----------|------------|
|     | The scanning direction is found to be Z        |           |            |
|     | FiPC-NICS is -2.048266 ppm, at 1.464 Angstrom1 |           |            |
| 1   | 0.000                                          | -8.681233 | -11.443733 |
| 2   | 0.050                                          | -8.718067 | -11.319400 |
| 3   | 0.101                                          | -8.819533 | -10.956400 |
| 4   | 0.151                                          | -8.960267 | -10.383200 |
| 5   | 0.201                                          | -9.104233 | -9.642533  |
| 6   | 0.251                                          | -9.211633 | -8.785567  |
| 7   | 0.302                                          | -9.246100 | -7.865667  |
| 8   | 0.352                                          | -9.180433 | -6.932633  |
| 9   | 0.402                                          | -8.999300 | -6.028900  |
| 10  | 0.452                                          | -8.699967 | -5.187100  |
| 11  | 0.503                                          | -8.290733 | -4.429633  |
| 12  | 0.553                                          | -7.787900 | -3.769133  |
| 13  | 0.603                                          | -7.212900 | -3.210233  |
| 14  | 0.653                                          | -6.589067 | -2.751167  |
| 15  | 0.704                                          | -5.939467 | -2.385800  |
| 16  | 0.754                                          | -5.284900 | -2.105233  |
| 17  | 0.804                                          | -4.643200 | -1.899133  |
| 18  | 0.854                                          | -4.028433 | -1.756667  |
| 19  | 0.905                                          | -3.451033 | -1.667233  |
| 20  | 0.955                                          | -2.917967 | -1.620933  |
| 21  | 1.005                                          | -2.433167 | -1.608733  |
| 22  | 1.055                                          | -1.997900 | -1.622600  |
| 23  | 1.106                                          | -1.611533 | -1.655667  |
| 24  | 1.156                                          | -1.271933 | -1.701967  |
| 25  | 1.206                                          | -0.975967 | -1.756667  |
| 26  | 1.256                                          | -0.719833 | -1.815767  |
| 27  | 1.307                                          | -0.499633 | -1.876033  |
| 28  | 1.357                                          | -0.311267 | -1.935000  |
| 29  | 1.407                                          | -0.151000 | -1.990833  |
| 30  | 1.457                                          | -0.015200 | -2.042167  |
| 31  | 1.508                                          | 0.099267  | -2.088100  |
| 32  | 1.558                                          | 0.195333  | -2.128067  |
| 33  | 1.608                                          | 0.275367  | -2.161833  |
| 34  | 1.658                                          | 0.341633  | -2.189267  |
| 35  | 1.709                                          | 0.395967  | -2.210500  |
| 36  | 1.759                                          | 0.439933  | -2.225733  |
| 37  | 1.809                                          | 0.475033  | -2.235267  |
| 38  | 1.859                                          | 0.502300  | -2.239467  |
| 39  | 1.910                                          | 0.522933  | -2.238700  |
| 40  | 1.960                                          | 0.537733  | -2.233400  |
| 41  | 2.010                                          | 0.547567  | -2.223967  |
| 42  | 2.060                                          | 0.553167  | -2.210767  |
| 43  | 2.111                                          | 0.555100  | -2.194233  |
| 44  | 2.161                                          | 0.554000  | -2.174733  |
| 45  | 2.211                                          | 0.550333  | -2.152600  |
| 46  | 2.261                                          | 0.544567  | -2.128167  |
| 47  | 2.312                                          | 0.537033  | -2.101767  |
| 48  | 2.362                                          | 0.528200  | -2.073600  |
| 49  | 2.412                                          | 0.518233  | -2.044033  |
| 50  | 2.462                                          | 0.507533  | -2.013200  |
| 51  | 2.513                                          | 0.496200  | -1.981367  |
| 52  | 2.563                                          | 0.484533  | -1.948733  |
| 53  | 2.613                                          | 0.472633  | -1.915467  |
| 54  | 2.663                                          | 0.460633  | -1.881733  |
| 55  | 2.714                                          | 0.448633  | -1.847633  |
| 56  | 2.764                                          | 0.436767  | -1.813333  |
| 57  | 2.814                                          | 0.425033  | -1.778933  |
| 58  | 2.864                                          | 0.413600  | -1.744567  |
| 59  | 2.915                                          | 0.402367  | -1.710233  |
| 60  | 2.965                                          | 0.391467  | -1.676100  |
| 61  | 3.015                                          | 0.380867  | -1.642200  |

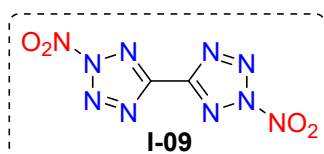

---

|     |       |          |           |
|-----|-------|----------|-----------|
| 62  | 3.065 | 0.370600 | -1.608600 |
| 63  | 3.116 | 0.360667 | -1.575333 |
| 64  | 3.166 | 0.351067 | -1.542467 |
| 65  | 3.216 | 0.341767 | -1.510000 |
| 66  | 3.266 | 0.332833 | -1.478033 |
| 67  | 3.317 | 0.324200 | -1.446533 |
| 68  | 3.367 | 0.315900 | -1.415567 |
| 69  | 3.417 | 0.307833 | -1.385133 |
| 70  | 3.467 | 0.300100 | -1.355233 |
| 71  | 3.518 | 0.292633 | -1.325900 |
| 72  | 3.568 | 0.285433 | -1.297133 |
| 73  | 3.618 | 0.278500 | -1.268933 |
| 74  | 3.668 | 0.271800 | -1.241333 |
| 75  | 3.719 | 0.265333 | -1.214300 |
| 76  | 3.769 | 0.259067 | -1.187833 |
| 77  | 3.819 | 0.253033 | -1.161967 |
| 78  | 3.869 | 0.247200 | -1.136667 |
| 79  | 3.920 | 0.241533 | -1.111933 |
| 80  | 3.970 | 0.236100 | -1.087767 |
| 81  | 4.020 | 0.230800 | -1.064167 |
| 82  | 4.070 | 0.225667 | -1.041133 |
| 83  | 4.121 | 0.220733 | -1.018600 |
| 84  | 4.171 | 0.215900 | -0.996633 |
| 85  | 4.221 | 0.211233 | -0.975200 |
| 86  | 4.271 | 0.206733 | -0.954267 |
| 87  | 4.322 | 0.202300 | -0.933833 |
| 88  | 4.372 | 0.198067 | -0.913900 |
| 89  | 4.422 | 0.193900 | -0.894433 |
| 90  | 4.472 | 0.189867 | -0.875467 |
| 91  | 4.523 | 0.185967 | -0.856967 |
| 92  | 4.573 | 0.182167 | -0.838933 |
| 93  | 4.623 | 0.178467 | -0.821333 |
| 94  | 4.673 | 0.174867 | -0.804133 |
| 95  | 4.724 | 0.171333 | -0.787400 |
| 96  | 4.774 | 0.167933 | -0.771067 |
| 97  | 4.824 | 0.164633 | -0.755133 |
| 98  | 4.874 | 0.161400 | -0.739600 |
| 99  | 4.925 | 0.158233 | -0.724433 |
| 100 | 4.975 | 0.155167 | -0.709667 |
| 101 | 5.025 | 0.152167 | -0.695233 |
| 102 | 5.075 | 0.149233 | -0.681167 |
| 103 | 5.126 | 0.146433 | -0.667433 |
| 104 | 5.176 | 0.143633 | -0.654067 |
| 105 | 5.226 | 0.140900 | -0.641000 |
| 106 | 5.276 | 0.138300 | -0.628267 |
| 107 | 5.327 | 0.135700 | -0.615833 |
| 108 | 5.377 | 0.133200 | -0.603700 |
| 109 | 5.427 | 0.130733 | -0.591867 |
| 110 | 5.477 | 0.128333 | -0.580333 |
| 111 | 5.528 | 0.126000 | -0.569033 |
| 112 | 5.578 | 0.123733 | -0.558033 |
| 113 | 5.628 | 0.121467 | -0.547300 |
| 114 | 5.678 | 0.119300 | -0.536833 |
| 115 | 5.729 | 0.117200 | -0.526600 |
| 116 | 5.779 | 0.115100 | -0.516600 |
| 117 | 5.829 | 0.113067 | -0.506833 |
| 118 | 5.879 | 0.111067 | -0.497300 |
| 119 | 5.930 | 0.109133 | -0.488000 |
| 120 | 5.980 | 0.107233 | -0.478900 |
| 121 | 6.030 | 0.105367 | -0.470033 |
| 122 | 6.080 | 0.103567 | -0.461367 |
| 123 | 6.131 | 0.101767 | -0.452900 |
| 124 | 6.181 | 0.100033 | -0.444633 |
| 125 | 6.231 | 0.098333 | -0.436533 |
| 126 | 6.281 | 0.096667 | -0.428633 |
| 127 | 6.332 | 0.095067 | -0.420900 |
| 128 | 6.382 | 0.093433 | -0.413367 |

---

---

|     |       |          |           |
|-----|-------|----------|-----------|
| 129 | 6.432 | 0.091900 | -0.405967 |
| 130 | 6.482 | 0.090367 | -0.398767 |
| 131 | 6.533 | 0.088867 | -0.391733 |
| 132 | 6.583 | 0.087400 | -0.384833 |
| 133 | 6.633 | 0.085967 | -0.378100 |
| 134 | 6.683 | 0.084567 | -0.371500 |
| 135 | 6.734 | 0.083200 | -0.365067 |
| 136 | 6.784 | 0.081833 | -0.358733 |
| 137 | 6.834 | 0.080533 | -0.352567 |
| 138 | 6.884 | 0.079267 | -0.346533 |
| 139 | 6.935 | 0.077967 | -0.340633 |
| 140 | 6.985 | 0.076733 | -0.334867 |
| 141 | 7.035 | 0.075533 | -0.329233 |
| 142 | 7.085 | 0.074367 | -0.323700 |
| 143 | 7.136 | 0.073167 | -0.318267 |
| 144 | 7.186 | 0.072033 | -0.312967 |
| 145 | 7.236 | 0.070933 | -0.307800 |
| 146 | 7.286 | 0.069800 | -0.302733 |
| 147 | 7.337 | 0.068733 | -0.297733 |
| 148 | 7.387 | 0.067667 | -0.292900 |
| 149 | 7.437 | 0.066633 | -0.288133 |
| 150 | 7.487 | 0.065633 | -0.283467 |
| 151 | 7.538 | 0.064633 | -0.278900 |
| 152 | 7.588 | 0.063633 | -0.274400 |
| 153 | 7.638 | 0.062700 | -0.270033 |
| 154 | 7.688 | 0.061767 | -0.265733 |
| 155 | 7.739 | 0.060833 | -0.261533 |
| 156 | 7.789 | 0.059933 | -0.257400 |
| 157 | 7.839 | 0.059067 | -0.253367 |
| 158 | 7.889 | 0.058167 | -0.249400 |
| 159 | 7.940 | 0.057333 | -0.245533 |
| 160 | 7.990 | 0.056500 | -0.241733 |
| 161 | 8.040 | 0.055667 | -0.238000 |
| 162 | 8.090 | 0.054867 | -0.234333 |
| 163 | 8.141 | 0.054067 | -0.230767 |
| 164 | 8.191 | 0.053267 | -0.227233 |
| 165 | 8.241 | 0.052533 | -0.223800 |
| 166 | 8.291 | 0.051767 | -0.220433 |
| 167 | 8.342 | 0.051067 | -0.217100 |
| 168 | 8.392 | 0.050300 | -0.213867 |
| 169 | 8.442 | 0.049600 | -0.210667 |
| 170 | 8.492 | 0.048933 | -0.207567 |
| 171 | 8.543 | 0.048200 | -0.204500 |
| 172 | 8.593 | 0.047533 | -0.201467 |
| 173 | 8.643 | 0.046867 | -0.198533 |
| 174 | 8.693 | 0.046233 | -0.195633 |
| 175 | 8.744 | 0.045600 | -0.192800 |
| 176 | 8.794 | 0.045000 | -0.190000 |
| 177 | 8.844 | 0.044367 | -0.187267 |
| 178 | 8.894 | 0.043733 | -0.184600 |
| 179 | 8.945 | 0.043167 | -0.181933 |
| 180 | 8.995 | 0.042567 | -0.179367 |
| 181 | 9.045 | 0.042000 | -0.176833 |
| 182 | 9.095 | 0.041467 | -0.174333 |
| 183 | 9.146 | 0.040867 | -0.171867 |
| 184 | 9.196 | 0.040333 | -0.169467 |
| 185 | 9.246 | 0.039800 | -0.167100 |
| 186 | 9.296 | 0.039267 | -0.164800 |
| 187 | 9.347 | 0.038767 | -0.162533 |
| 188 | 9.397 | 0.038267 | -0.160267 |
| 189 | 9.447 | 0.037733 | -0.158100 |
| 190 | 9.497 | 0.037233 | -0.155933 |
| 191 | 9.548 | 0.036767 | -0.153800 |
| 192 | 9.598 | 0.036300 | -0.151733 |
| 193 | 9.648 | 0.035833 | -0.149667 |
| 194 | 9.698 | 0.035367 | -0.147667 |
| 195 | 9.749 | 0.034900 | -0.145700 |

---

|     |        |          |           |
|-----|--------|----------|-----------|
| 196 | 9.799  | 0.034467 | -0.143733 |
| 197 | 9.849  | 0.034033 | -0.141833 |
| 198 | 9.899  | 0.033600 | -0.139967 |
| 199 | 9.950  | 0.033200 | -0.138133 |
| 200 | 10.000 | 0.032733 | -0.136300 |

The scanning direction is found to be Z

FiPC-NICS is -7.096105 ppm, at 1.506 Angstrom

|    |       |           |            |
|----|-------|-----------|------------|
| 1  | 0.000 | -7.573000 | -3.632467  |
| 2  | 0.050 | -7.539833 | -3.711900  |
| 3  | 0.101 | -7.441233 | -3.945367  |
| 4  | 0.151 | -7.279633 | -4.319333  |
| 5  | 0.201 | -7.059100 | -4.812633  |
| 6  | 0.251 | -6.785200 | -5.398367  |
| 7  | 0.302 | -6.464700 | -6.046067  |
| 8  | 0.352 | -6.105600 | -6.724200  |
| 9  | 0.402 | -5.716667 | -7.402233  |
| 10 | 0.452 | -5.306867 | -8.052633  |
| 11 | 0.503 | -4.885300 | -8.652000  |
| 12 | 0.553 | -4.460433 | -9.182100  |
| 13 | 0.603 | -4.040000 | -9.630000  |
| 14 | 0.653 | -3.630600 | -9.988067  |
| 15 | 0.704 | -3.237667 | -10.253367 |
| 16 | 0.754 | -2.865367 | -10.427033 |
| 17 | 0.804 | -2.516500 | -10.513433 |
| 18 | 0.854 | -2.192867 | -10.519300 |
| 19 | 0.905 | -1.895233 | -10.452933 |
| 20 | 0.955 | -1.623600 | -10.323600 |
| 21 | 1.005 | -1.377333 | -10.140833 |
| 22 | 1.055 | -1.155333 | -9.913967  |
| 23 | 1.106 | -0.956267 | -9.651867  |
| 24 | 1.156 | -0.778533 | -9.362767  |
| 25 | 1.206 | -0.620533 | -9.053967  |
| 26 | 1.256 | -0.480600 | -8.731867  |
| 27 | 1.307 | -0.357033 | -8.402033  |
| 28 | 1.357 | -0.248433 | -8.069100  |
| 29 | 1.407 | -0.153267 | -7.736900  |
| 30 | 1.457 | -0.070133 | -7.408567  |
| 31 | 1.508 | 0.002133  | -7.086600  |
| 32 | 1.558 | 0.064733  | -6.772867  |
| 33 | 1.608 | 0.118767  | -6.468800  |
| 34 | 1.658 | 0.165100  | -6.175467  |
| 35 | 1.709 | 0.204633  | -5.893533  |
| 36 | 1.759 | 0.238167  | -5.623400  |
| 37 | 1.809 | 0.266400  | -5.365300  |
| 38 | 1.859 | 0.290000  | -5.119200  |
| 39 | 1.910 | 0.309467  | -4.885000  |
| 40 | 1.960 | 0.325367  | -4.662467  |
| 41 | 2.010 | 0.338167  | -4.451300  |
| 42 | 2.060 | 0.348200  | -4.251100  |
| 43 | 2.111 | 0.355933  | -4.061433  |
| 44 | 2.161 | 0.361600  | -3.881900  |
| 45 | 2.211 | 0.365467  | -3.712000  |
| 46 | 2.261 | 0.367867  | -3.551300  |
| 47 | 2.312 | 0.368933  | -3.399333  |
| 48 | 2.362 | 0.368900  | -3.255633  |
| 49 | 2.412 | 0.367867  | -3.119733  |
| 50 | 2.462 | 0.366067  | -2.991200  |
| 51 | 2.513 | 0.363567  | -2.869667  |
| 52 | 2.563 | 0.360500  | -2.754667  |
| 53 | 2.613 | 0.356900  | -2.645833  |
| 54 | 2.663 | 0.352900  | -2.542800  |
| 55 | 2.714 | 0.348600  | -2.445233  |
| 56 | 2.764 | 0.343967  | -2.352833  |
| 57 | 2.814 | 0.339133  | -2.265200  |
| 58 | 2.864 | 0.334100  | -2.182133  |
| 59 | 2.915 | 0.328933  | -2.103300  |
| 60 | 2.965 | 0.323633  | -2.028467  |

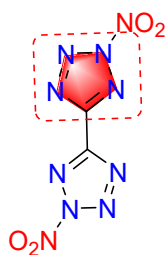

---

|     |       |          |           |
|-----|-------|----------|-----------|
| 61  | 3.015 | 0.318233 | -1.957367 |
| 62  | 3.065 | 0.312800 | -1.889833 |
| 63  | 3.116 | 0.307367 | -1.825567 |
| 64  | 3.166 | 0.301900 | -1.764433 |
| 65  | 3.216 | 0.296400 | -1.706200 |
| 66  | 3.266 | 0.290933 | -1.650733 |
| 67  | 3.317 | 0.285500 | -1.597867 |
| 68  | 3.367 | 0.280133 | -1.547433 |
| 69  | 3.417 | 0.274767 | -1.499267 |
| 70  | 3.467 | 0.269500 | -1.453267 |
| 71  | 3.518 | 0.264300 | -1.409300 |
| 72  | 3.568 | 0.259133 | -1.367267 |
| 73  | 3.618 | 0.254067 | -1.327000 |
| 74  | 3.668 | 0.249067 | -1.288467 |
| 75  | 3.719 | 0.244133 | -1.251567 |
| 76  | 3.769 | 0.239333 | -1.216167 |
| 77  | 3.819 | 0.234567 | -1.182200 |
| 78  | 3.869 | 0.229900 | -1.149600 |
| 79  | 3.920 | 0.225367 | -1.118300 |
| 80  | 3.970 | 0.220867 | -1.088200 |
| 81  | 4.020 | 0.216467 | -1.059267 |
| 82  | 4.070 | 0.212167 | -1.031433 |
| 83  | 4.121 | 0.207933 | -1.004667 |
| 84  | 4.171 | 0.203833 | -0.978867 |
| 85  | 4.221 | 0.199800 | -0.954000 |
| 86  | 4.271 | 0.195833 | -0.930033 |
| 87  | 4.322 | 0.191933 | -0.906933 |
| 88  | 4.372 | 0.188133 | -0.884633 |
| 89  | 4.422 | 0.184433 | -0.863100 |
| 90  | 4.472 | 0.180833 | -0.842300 |
| 91  | 4.523 | 0.177267 | -0.822233 |
| 92  | 4.573 | 0.173800 | -0.802800 |
| 93  | 4.623 | 0.170400 | -0.784033 |
| 94  | 4.673 | 0.167100 | -0.765867 |
| 95  | 4.724 | 0.163833 | -0.748300 |
| 96  | 4.774 | 0.160700 | -0.731300 |
| 97  | 4.824 | 0.157600 | -0.714800 |
| 98  | 4.874 | 0.154567 | -0.698833 |
| 99  | 4.925 | 0.151600 | -0.683367 |
| 100 | 4.975 | 0.148733 | -0.668367 |
| 101 | 5.025 | 0.145900 | -0.653800 |
| 102 | 5.075 | 0.143133 | -0.639700 |
| 103 | 5.126 | 0.140433 | -0.626000 |
| 104 | 5.176 | 0.137767 | -0.612700 |
| 105 | 5.226 | 0.135233 | -0.599800 |
| 106 | 5.276 | 0.132667 | -0.587267 |
| 107 | 5.327 | 0.130233 | -0.575100 |
| 108 | 5.377 | 0.127833 | -0.563233 |
| 109 | 5.427 | 0.125467 | -0.551733 |
| 110 | 5.477 | 0.123167 | -0.540567 |
| 111 | 5.528 | 0.120933 | -0.529667 |
| 112 | 5.578 | 0.118700 | -0.519100 |
| 113 | 5.628 | 0.116567 | -0.508800 |
| 114 | 5.678 | 0.114467 | -0.498767 |
| 115 | 5.729 | 0.112433 | -0.489000 |
| 116 | 5.779 | 0.110400 | -0.479500 |
| 117 | 5.829 | 0.108467 | -0.470233 |
| 118 | 5.879 | 0.106567 | -0.461233 |
| 119 | 5.930 | 0.104633 | -0.452433 |
| 120 | 5.980 | 0.102800 | -0.443900 |
| 121 | 6.030 | 0.101033 | -0.435533 |
| 122 | 6.080 | 0.099267 | -0.427400 |
| 123 | 6.131 | 0.097567 | -0.419467 |
| 124 | 6.181 | 0.095867 | -0.411733 |
| 125 | 6.231 | 0.094233 | -0.404200 |
| 126 | 6.281 | 0.092667 | -0.396833 |
| 127 | 6.332 | 0.091067 | -0.389667 |

---

---

|     |       |          |           |
|-----|-------|----------|-----------|
| 128 | 6.382 | 0.089533 | -0.382633 |
| 129 | 6.432 | 0.088033 | -0.375800 |
| 130 | 6.482 | 0.086567 | -0.369100 |
| 131 | 6.533 | 0.085133 | -0.362600 |
| 132 | 6.583 | 0.083700 | -0.356233 |
| 133 | 6.633 | 0.082333 | -0.350000 |
| 134 | 6.683 | 0.081000 | -0.343900 |
| 135 | 6.734 | 0.079633 | -0.337967 |
| 136 | 6.784 | 0.078367 | -0.332167 |
| 137 | 6.834 | 0.077100 | -0.326500 |
| 138 | 6.884 | 0.075833 | -0.320933 |
| 139 | 6.935 | 0.074633 | -0.315533 |
| 140 | 6.985 | 0.073433 | -0.310233 |
| 141 | 7.035 | 0.072267 | -0.305033 |
| 142 | 7.085 | 0.071133 | -0.299967 |
| 143 | 7.136 | 0.070000 | -0.295000 |
| 144 | 7.186 | 0.068933 | -0.290133 |
| 145 | 7.236 | 0.067833 | -0.285400 |
| 146 | 7.286 | 0.066767 | -0.280767 |
| 147 | 7.337 | 0.065733 | -0.276200 |
| 148 | 7.387 | 0.064733 | -0.271767 |
| 149 | 7.437 | 0.063767 | -0.267400 |
| 150 | 7.487 | 0.062767 | -0.263133 |
| 151 | 7.538 | 0.061800 | -0.258967 |
| 152 | 7.588 | 0.060867 | -0.254867 |
| 153 | 7.638 | 0.059967 | -0.250867 |
| 154 | 7.688 | 0.059067 | -0.246933 |
| 155 | 7.739 | 0.058200 | -0.243100 |
| 156 | 7.789 | 0.057300 | -0.239333 |
| 157 | 7.839 | 0.056467 | -0.235633 |
| 158 | 7.889 | 0.055667 | -0.232033 |
| 159 | 7.940 | 0.054800 | -0.228500 |
| 160 | 7.990 | 0.054000 | -0.225000 |
| 161 | 8.040 | 0.053233 | -0.221600 |
| 162 | 8.090 | 0.052467 | -0.218267 |
| 163 | 8.141 | 0.051733 | -0.215000 |
| 164 | 8.191 | 0.050967 | -0.211800 |
| 165 | 8.241 | 0.050233 | -0.208667 |
| 166 | 8.291 | 0.049533 | -0.205567 |
| 167 | 8.342 | 0.048833 | -0.202567 |
| 168 | 8.392 | 0.048133 | -0.199600 |
| 169 | 8.442 | 0.047467 | -0.196667 |
| 170 | 8.492 | 0.046800 | -0.193833 |
| 171 | 8.543 | 0.046133 | -0.191033 |
| 172 | 8.593 | 0.045500 | -0.188267 |
| 173 | 8.643 | 0.044867 | -0.185567 |
| 174 | 8.693 | 0.044233 | -0.182933 |
| 175 | 8.744 | 0.043667 | -0.180333 |
| 176 | 8.794 | 0.043033 | -0.177800 |
| 177 | 8.844 | 0.042467 | -0.175300 |
| 178 | 8.894 | 0.041867 | -0.172833 |
| 179 | 8.945 | 0.041333 | -0.170433 |
| 180 | 8.995 | 0.040733 | -0.168067 |
| 181 | 9.045 | 0.040200 | -0.165733 |
| 182 | 9.095 | 0.039667 | -0.163433 |
| 183 | 9.146 | 0.039167 | -0.161200 |
| 184 | 9.196 | 0.038633 | -0.159000 |
| 185 | 9.246 | 0.038133 | -0.156833 |
| 186 | 9.296 | 0.037600 | -0.154700 |
| 187 | 9.347 | 0.037100 | -0.152633 |
| 188 | 9.397 | 0.036667 | -0.150567 |
| 189 | 9.447 | 0.036167 | -0.148567 |
| 190 | 9.497 | 0.035733 | -0.146567 |
| 191 | 9.548 | 0.035233 | -0.144633 |
| 192 | 9.598 | 0.034800 | -0.142733 |
| 193 | 9.648 | 0.034333 | -0.140833 |
| 194 | 9.698 | 0.033900 | -0.139000 |

---

|     |        |          |           |
|-----|--------|----------|-----------|
| 195 | 9.749  | 0.033500 | -0.137200 |
| 196 | 9.799  | 0.033033 | -0.135400 |
| 197 | 9.849  | 0.032633 | -0.133633 |
| 198 | 9.899  | 0.032233 | -0.131933 |
| 199 | 9.950  | 0.031833 | -0.130233 |
| 200 | 10.000 | 0.031433 | -0.128567 |

The scanning direction is found to be Z

FiPC-NICS is -1.305290 ppm, at 1.605 Angstrom

|    |       |            |            |
|----|-------|------------|------------|
| 1  | 0.000 | -21.329300 | -15.132900 |
| 2  | 0.050 | -21.602833 | -15.001400 |
| 3  | 0.101 | -22.352267 | -14.619467 |
| 4  | 0.151 | -23.392367 | -14.019867 |
| 5  | 0.201 | -24.473200 | -13.250400 |
| 6  | 0.251 | -25.344133 | -12.365900 |
| 7  | 0.302 | -25.807300 | -11.420233 |
| 8  | 0.352 | -25.748333 | -10.460267 |
| 9  | 0.402 | -25.140367 | -9.522533  |
| 10 | 0.452 | -24.029000 | -8.632167  |
| 11 | 0.503 | -22.507533 | -7.804133  |
| 12 | 0.553 | -20.691833 | -7.045267  |
| 13 | 0.603 | -18.700167 | -6.356667  |
| 14 | 0.653 | -16.639600 | -5.735767  |
| 15 | 0.704 | -14.598833 | -5.178200  |
| 16 | 0.754 | -12.645633 | -4.678800  |
| 17 | 0.804 | -10.827167 | -4.232333  |
| 18 | 0.854 | -9.172267  | -3.833867  |
| 19 | 0.905 | -7.694533  | -3.478833  |
| 20 | 0.955 | -6.395700  | -3.163100  |
| 21 | 1.005 | -5.269067  | -2.883000  |
| 22 | 1.055 | -4.302233  | -2.635067  |
| 23 | 1.106 | -3.479733  | -2.416267  |
| 24 | 1.156 | -2.784833  | -2.223733  |
| 25 | 1.206 | -2.200967  | -2.054867  |
| 26 | 1.256 | -1.712633  | -1.907200  |
| 27 | 1.307 | -1.305767  | -1.778533  |
| 28 | 1.357 | -0.967933  | -1.666800  |
| 29 | 1.407 | -0.688433  | -1.570133  |
| 30 | 1.457 | -0.458233  | -1.486800  |
| 31 | 1.508 | -0.269467  | -1.415200  |
| 32 | 1.558 | -0.115667  | -1.353900  |
| 33 | 1.608 | 0.008700   | -1.301633  |
| 34 | 1.658 | 0.108333   | -1.257167  |
| 35 | 1.709 | 0.187267   | -1.219500  |
| 36 | 1.759 | 0.248900   | -1.187667  |
| 37 | 1.809 | 0.296167   | -1.160867  |
| 38 | 1.859 | 0.331500   | -1.138267  |
| 39 | 1.910 | 0.357167   | -1.119300  |
| 40 | 1.960 | 0.374967   | -1.103367  |
| 41 | 2.010 | 0.386400   | -1.089967  |
| 42 | 2.060 | 0.392833   | -1.078600  |
| 43 | 2.111 | 0.395433   | -1.069000  |
| 44 | 2.161 | 0.395033   | -1.060733  |
| 45 | 2.211 | 0.392433   | -1.053567  |
| 46 | 2.261 | 0.388200   | -1.047267  |
| 47 | 2.312 | 0.382900   | -1.041633  |
| 48 | 2.362 | 0.376833   | -1.036433  |
| 49 | 2.412 | 0.370300   | -1.031600  |
| 50 | 2.462 | 0.363600   | -1.027000  |
| 51 | 2.513 | 0.356800   | -1.022467  |
| 52 | 2.563 | 0.350033   | -1.018000  |
| 53 | 2.613 | 0.343433   | -1.013500  |
| 54 | 2.663 | 0.337000   | -1.008933  |
| 55 | 2.714 | 0.330733   | -1.004200  |
| 56 | 2.764 | 0.324700   | -0.999333  |
| 57 | 2.814 | 0.318900   | -0.994267  |
| 58 | 2.864 | 0.313333   | -0.989033  |
| 59 | 2.915 | 0.307900   | -0.983567  |

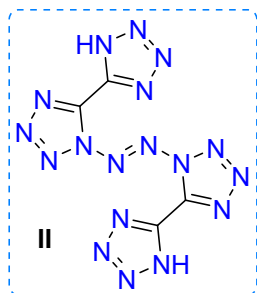

---

|     |       |          |           |
|-----|-------|----------|-----------|
| 60  | 2.965 | 0.302700 | -0.977867 |
| 61  | 3.015 | 0.297700 | -0.971967 |
| 62  | 3.065 | 0.292833 | -0.965833 |
| 63  | 3.116 | 0.288133 | -0.959467 |
| 64  | 3.166 | 0.283533 | -0.952933 |
| 65  | 3.216 | 0.279133 | -0.946167 |
| 66  | 3.266 | 0.274767 | -0.939200 |
| 67  | 3.317 | 0.270533 | -0.932033 |
| 68  | 3.367 | 0.266433 | -0.924700 |
| 69  | 3.417 | 0.262433 | -0.917200 |
| 70  | 3.467 | 0.258467 | -0.909533 |
| 71  | 3.518 | 0.254600 | -0.901700 |
| 72  | 3.568 | 0.250800 | -0.893767 |
| 73  | 3.618 | 0.247133 | -0.885667 |
| 74  | 3.668 | 0.243467 | -0.877500 |
| 75  | 3.719 | 0.239867 | -0.869200 |
| 76  | 3.769 | 0.236367 | -0.860800 |
| 77  | 3.819 | 0.232900 | -0.852333 |
| 78  | 3.869 | 0.229533 | -0.843800 |
| 79  | 3.920 | 0.226200 | -0.835167 |
| 80  | 3.970 | 0.222867 | -0.826500 |
| 81  | 4.020 | 0.219633 | -0.817800 |
| 82  | 4.070 | 0.216433 | -0.809067 |
| 83  | 4.121 | 0.213333 | -0.800300 |
| 84  | 4.171 | 0.210233 | -0.791500 |
| 85  | 4.221 | 0.207167 | -0.782700 |
| 86  | 4.271 | 0.204167 | -0.773900 |
| 87  | 4.322 | 0.201200 | -0.765100 |
| 88  | 4.372 | 0.198300 | -0.756300 |
| 89  | 4.422 | 0.195433 | -0.747500 |
| 90  | 4.472 | 0.192633 | -0.738767 |
| 91  | 4.523 | 0.189833 | -0.730033 |
| 92  | 4.573 | 0.187100 | -0.721300 |
| 93  | 4.623 | 0.184367 | -0.712633 |
| 94  | 4.673 | 0.181733 | -0.704033 |
| 95  | 4.724 | 0.179100 | -0.695433 |
| 96  | 4.774 | 0.176500 | -0.686900 |
| 97  | 4.824 | 0.173967 | -0.678433 |
| 98  | 4.874 | 0.171467 | -0.670000 |
| 99  | 4.925 | 0.168967 | -0.661633 |
| 100 | 4.975 | 0.166567 | -0.653333 |
| 101 | 5.025 | 0.164133 | -0.645067 |
| 102 | 5.075 | 0.161800 | -0.636900 |
| 103 | 5.126 | 0.159433 | -0.628800 |
| 104 | 5.176 | 0.157167 | -0.620767 |
| 105 | 5.226 | 0.154900 | -0.612800 |
| 106 | 5.276 | 0.152667 | -0.604933 |
| 107 | 5.327 | 0.150467 | -0.597100 |
| 108 | 5.377 | 0.148333 | -0.589367 |
| 109 | 5.427 | 0.146200 | -0.581733 |
| 110 | 5.477 | 0.144067 | -0.574167 |
| 111 | 5.528 | 0.142033 | -0.566667 |
| 112 | 5.578 | 0.140000 | -0.559267 |
| 113 | 5.628 | 0.138000 | -0.551933 |
| 114 | 5.678 | 0.136033 | -0.544667 |
| 115 | 5.729 | 0.134100 | -0.537533 |
| 116 | 5.779 | 0.132200 | -0.530433 |
| 117 | 5.829 | 0.130300 | -0.523467 |
| 118 | 5.879 | 0.128467 | -0.516533 |
| 119 | 5.930 | 0.126633 | -0.509700 |
| 120 | 5.980 | 0.124833 | -0.502967 |
| 121 | 6.030 | 0.123067 | -0.496333 |
| 122 | 6.080 | 0.121367 | -0.489733 |
| 123 | 6.131 | 0.119633 | -0.483267 |
| 124 | 6.181 | 0.117967 | -0.476833 |
| 125 | 6.231 | 0.116267 | -0.470533 |
| 126 | 6.281 | 0.114667 | -0.464300 |

---

---

|     |       |          |           |
|-----|-------|----------|-----------|
| 127 | 6.332 | 0.113033 | -0.458133 |
| 128 | 6.382 | 0.111500 | -0.452067 |
| 129 | 6.432 | 0.109900 | -0.446067 |
| 130 | 6.482 | 0.108367 | -0.440133 |
| 131 | 6.533 | 0.106867 | -0.434300 |
| 132 | 6.583 | 0.105367 | -0.428567 |
| 133 | 6.633 | 0.103933 | -0.422900 |
| 134 | 6.683 | 0.102500 | -0.417300 |
| 135 | 6.734 | 0.101100 | -0.411767 |
| 136 | 6.784 | 0.099667 | -0.406333 |
| 137 | 6.834 | 0.098333 | -0.400967 |
| 138 | 6.884 | 0.096967 | -0.395700 |
| 139 | 6.935 | 0.095633 | -0.390467 |
| 140 | 6.985 | 0.094333 | -0.385333 |
| 141 | 7.035 | 0.093067 | -0.380267 |
| 142 | 7.085 | 0.091800 | -0.375267 |
| 143 | 7.136 | 0.090567 | -0.370333 |
| 144 | 7.186 | 0.089333 | -0.365500 |
| 145 | 7.236 | 0.088100 | -0.360700 |
| 146 | 7.286 | 0.086933 | -0.356000 |
| 147 | 7.337 | 0.085767 | -0.351367 |
| 148 | 7.387 | 0.084600 | -0.346767 |
| 149 | 7.437 | 0.083467 | -0.342267 |
| 150 | 7.487 | 0.082367 | -0.337833 |
| 151 | 7.538 | 0.081267 | -0.333433 |
| 152 | 7.588 | 0.080167 | -0.329133 |
| 153 | 7.638 | 0.079133 | -0.324867 |
| 154 | 7.688 | 0.078100 | -0.320667 |
| 155 | 7.739 | 0.077033 | -0.316533 |
| 156 | 7.789 | 0.076033 | -0.312467 |
| 157 | 7.839 | 0.075033 | -0.308467 |
| 158 | 7.889 | 0.074033 | -0.304533 |
| 159 | 7.940 | 0.073067 | -0.300633 |
| 160 | 7.990 | 0.072133 | -0.296800 |
| 161 | 8.040 | 0.071200 | -0.293000 |
| 162 | 8.090 | 0.070267 | -0.289300 |
| 163 | 8.141 | 0.069367 | -0.285633 |
| 164 | 8.191 | 0.068467 | -0.282000 |
| 165 | 8.241 | 0.067600 | -0.278433 |
| 166 | 8.291 | 0.066733 | -0.274933 |
| 167 | 8.342 | 0.065867 | -0.271467 |
| 168 | 8.392 | 0.065000 | -0.268067 |
| 169 | 8.442 | 0.064200 | -0.264733 |
| 170 | 8.492 | 0.063367 | -0.261400 |
| 171 | 8.543 | 0.062600 | -0.258167 |
| 172 | 8.593 | 0.061800 | -0.254933 |
| 173 | 8.643 | 0.061000 | -0.251800 |
| 174 | 8.693 | 0.060233 | -0.248667 |
| 175 | 8.744 | 0.059500 | -0.245600 |
| 176 | 8.794 | 0.058767 | -0.242567 |
| 177 | 8.844 | 0.058033 | -0.239600 |
| 178 | 8.894 | 0.057300 | -0.236667 |
| 179 | 8.945 | 0.056600 | -0.233767 |
| 180 | 8.995 | 0.055900 | -0.230900 |
| 181 | 9.045 | 0.055233 | -0.228100 |
| 182 | 9.095 | 0.054533 | -0.225333 |
| 183 | 9.146 | 0.053867 | -0.222600 |
| 184 | 9.196 | 0.053200 | -0.219900 |
| 185 | 9.246 | 0.052567 | -0.217267 |
| 186 | 9.296 | 0.051900 | -0.214633 |
| 187 | 9.347 | 0.051300 | -0.212067 |
| 188 | 9.397 | 0.050667 | -0.209533 |
| 189 | 9.447 | 0.050067 | -0.207033 |
| 190 | 9.497 | 0.049467 | -0.204567 |
| 191 | 9.548 | 0.048867 | -0.202133 |
| 192 | 9.598 | 0.048267 | -0.199733 |
| 193 | 9.648 | 0.047700 | -0.197400 |

---

---

|     |        |          |           |
|-----|--------|----------|-----------|
| 194 | 9.698  | 0.047133 | -0.195067 |
| 195 | 9.749  | 0.046567 | -0.192767 |
| 196 | 9.799  | 0.046033 | -0.190500 |
| 197 | 9.849  | 0.045467 | -0.188300 |
| 198 | 9.899  | 0.044933 | -0.186100 |
| 199 | 9.950  | 0.044433 | -0.183933 |
| 200 | 10.000 | 0.043900 | -0.181800 |

---

The scanning direction is found to be Z

FiPC-NICS is -8.953969 ppm, at 1.340 Angstrom

|    |       |           |            |
|----|-------|-----------|------------|
| 1  | 0.000 | -6.068333 | -4.906000  |
| 2  | 0.050 | -6.042200 | -4.987267  |
| 3  | 0.101 | -5.964267 | -5.226200  |
| 4  | 0.151 | -5.836100 | -5.608733  |
| 5  | 0.201 | -5.660200 | -6.112767  |
| 6  | 0.251 | -5.440200 | -6.710333  |
| 7  | 0.302 | -5.181000 | -7.369733  |
| 8  | 0.352 | -4.888333 | -8.058133  |
| 9  | 0.402 | -4.568900 | -8.743900  |
| 10 | 0.452 | -4.229867 | -9.398333  |
| 11 | 0.503 | -3.878767 | -9.997367  |
| 12 | 0.553 | -3.522833 | -10.522133 |
| 13 | 0.603 | -3.168867 | -10.959433 |
| 14 | 0.653 | -2.822900 | -11.301500 |
| 15 | 0.704 | -2.489800 | -11.545633 |
| 16 | 0.754 | -2.173633 | -11.693200 |
| 17 | 0.804 | -1.877067 | -11.749000 |
| 18 | 0.854 | -1.601967 | -11.720300 |
| 19 | 0.905 | -1.349167 | -11.616033 |
| 20 | 0.955 | -1.118833 | -11.446000 |
| 21 | 1.005 | -0.910467 | -11.220333 |
| 22 | 1.055 | -0.723267 | -10.948933 |
| 23 | 1.106 | -0.556000 | -10.641233 |
| 24 | 1.156 | -0.407333 | -10.305900 |
| 25 | 1.206 | -0.275933 | -9.950667  |
| 26 | 1.256 | -0.160300 | -9.582333  |
| 27 | 1.307 | -0.059033 | -9.206733  |
| 28 | 1.357 | 0.029233  | -8.828800  |
| 29 | 1.407 | 0.105733  | -8.452633  |
| 30 | 1.457 | 0.171633  | -8.081467  |
| 31 | 1.508 | 0.228100  | -7.718000  |
| 32 | 1.558 | 0.276067  | -7.364167  |
| 33 | 1.608 | 0.316533  | -7.021533  |
| 34 | 1.658 | 0.350267  | -6.691133  |
| 35 | 1.709 | 0.378067  | -6.373767  |
| 36 | 1.759 | 0.400667  | -6.069800  |
| 37 | 1.809 | 0.418633  | -5.779467  |
| 38 | 1.859 | 0.432567  | -5.502767  |
| 39 | 1.910 | 0.442900  | -5.239500  |
| 40 | 1.960 | 0.450233  | -4.989500  |
| 41 | 2.010 | 0.454867  | -4.752333  |
| 42 | 2.060 | 0.457233  | -4.527600  |
| 43 | 2.111 | 0.457600  | -4.314867  |
| 44 | 2.161 | 0.456267  | -4.113633  |
| 45 | 2.211 | 0.453467  | -3.923367  |
| 46 | 2.261 | 0.449500  | -3.743533  |
| 47 | 2.312 | 0.444500  | -3.573667  |
| 48 | 2.362 | 0.438700  | -3.413200  |
| 49 | 2.412 | 0.432167  | -3.261667  |
| 50 | 2.462 | 0.425100  | -3.118533  |
| 51 | 2.513 | 0.417600  | -2.983400  |
| 52 | 2.563 | 0.409733  | -2.855733  |
| 53 | 2.613 | 0.401667  | -2.735133  |
| 54 | 2.663 | 0.393433  | -2.621167  |
| 55 | 2.714 | 0.385033  | -2.513500  |
| 56 | 2.764 | 0.376600  | -2.411667  |
| 57 | 2.814 | 0.368200  | -2.315367  |
| 58 | 2.864 | 0.359800  | -2.224267  |

---

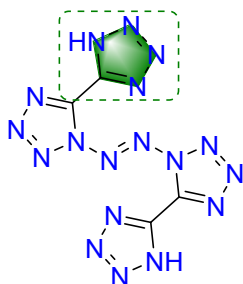

---

|     |       |          |           |
|-----|-------|----------|-----------|
| 59  | 2.915 | 0.351500 | -2.138067 |
| 60  | 2.965 | 0.343267 | -2.056400 |
| 61  | 3.015 | 0.335167 | -1.979067 |
| 62  | 3.065 | 0.327200 | -1.905733 |
| 63  | 3.116 | 0.319367 | -1.836233 |
| 64  | 3.166 | 0.311700 | -1.770267 |
| 65  | 3.216 | 0.304200 | -1.707667 |
| 66  | 3.266 | 0.296933 | -1.648200 |
| 67  | 3.317 | 0.289800 | -1.591667 |
| 68  | 3.367 | 0.282867 | -1.537933 |
| 69  | 3.417 | 0.276100 | -1.486800 |
| 70  | 3.467 | 0.269567 | -1.438133 |
| 71  | 3.518 | 0.263200 | -1.391800 |
| 72  | 3.568 | 0.257000 | -1.347600 |
| 73  | 3.618 | 0.251000 | -1.305500 |
| 74  | 3.668 | 0.245200 | -1.265300 |
| 75  | 3.719 | 0.239500 | -1.226933 |
| 76  | 3.769 | 0.234033 | -1.190267 |
| 77  | 3.819 | 0.228700 | -1.155233 |
| 78  | 3.869 | 0.223533 | -1.121733 |
| 79  | 3.920 | 0.218567 | -1.089667 |
| 80  | 3.970 | 0.213700 | -1.058967 |
| 81  | 4.020 | 0.208967 | -1.029567 |
| 82  | 4.070 | 0.204400 | -1.001367 |
| 83  | 4.121 | 0.199967 | -0.974367 |
| 84  | 4.171 | 0.195667 | -0.948433 |
| 85  | 4.221 | 0.191500 | -0.923533 |
| 86  | 4.271 | 0.187433 | -0.899600 |
| 87  | 4.322 | 0.183500 | -0.876633 |
| 88  | 4.372 | 0.179700 | -0.854533 |
| 89  | 4.422 | 0.175967 | -0.833267 |
| 90  | 4.472 | 0.172367 | -0.812833 |
| 91  | 4.523 | 0.168867 | -0.793133 |
| 92  | 4.573 | 0.165467 | -0.774133 |
| 93  | 4.623 | 0.162133 | -0.755867 |
| 94  | 4.673 | 0.158933 | -0.738200 |
| 95  | 4.724 | 0.155767 | -0.721200 |
| 96  | 4.774 | 0.152767 | -0.704767 |
| 97  | 4.824 | 0.149767 | -0.688900 |
| 98  | 4.874 | 0.146900 | -0.673600 |
| 99  | 4.925 | 0.144100 | -0.658800 |
| 100 | 4.975 | 0.141367 | -0.644500 |
| 101 | 5.025 | 0.138700 | -0.630633 |
| 102 | 5.075 | 0.136100 | -0.617233 |
| 103 | 5.126 | 0.133600 | -0.604300 |
| 104 | 5.176 | 0.131100 | -0.591733 |
| 105 | 5.226 | 0.128733 | -0.579567 |
| 106 | 5.276 | 0.126400 | -0.567800 |
| 107 | 5.327 | 0.124100 | -0.556367 |
| 108 | 5.377 | 0.121900 | -0.545300 |
| 109 | 5.427 | 0.119733 | -0.534533 |
| 110 | 5.477 | 0.117633 | -0.524133 |
| 111 | 5.528 | 0.115600 | -0.514000 |
| 112 | 5.578 | 0.113567 | -0.504167 |
| 113 | 5.628 | 0.111633 | -0.494633 |
| 114 | 5.678 | 0.109733 | -0.485367 |
| 115 | 5.729 | 0.107867 | -0.476333 |
| 116 | 5.779 | 0.106033 | -0.467567 |
| 117 | 5.829 | 0.104267 | -0.459033 |
| 118 | 5.879 | 0.102533 | -0.450767 |
| 119 | 5.930 | 0.100867 | -0.442700 |
| 120 | 5.980 | 0.099200 | -0.434833 |
| 121 | 6.030 | 0.097567 | -0.427167 |
| 122 | 6.080 | 0.096000 | -0.419733 |
| 123 | 6.131 | 0.094467 | -0.412467 |
| 124 | 6.181 | 0.092967 | -0.405400 |
| 125 | 6.231 | 0.091500 | -0.398500 |

---

---

|     |       |          |           |
|-----|-------|----------|-----------|
| 126 | 6.281 | 0.090033 | -0.391800 |
| 127 | 6.332 | 0.088633 | -0.385233 |
| 128 | 6.382 | 0.087267 | -0.378867 |
| 129 | 6.432 | 0.085900 | -0.372633 |
| 130 | 6.482 | 0.084600 | -0.366533 |
| 131 | 6.533 | 0.083300 | -0.360600 |
| 132 | 6.583 | 0.082067 | -0.354800 |
| 133 | 6.633 | 0.080800 | -0.349133 |
| 134 | 6.683 | 0.079600 | -0.343600 |
| 135 | 6.734 | 0.078400 | -0.338200 |
| 136 | 6.784 | 0.077267 | -0.332933 |
| 137 | 6.834 | 0.076133 | -0.327767 |
| 138 | 6.884 | 0.075033 | -0.322733 |
| 139 | 6.935 | 0.073933 | -0.317800 |
| 140 | 6.985 | 0.072867 | -0.312967 |
| 141 | 7.035 | 0.071833 | -0.308267 |
| 142 | 7.085 | 0.070800 | -0.303633 |
| 143 | 7.136 | 0.069800 | -0.299133 |
| 144 | 7.186 | 0.068800 | -0.294733 |
| 145 | 7.236 | 0.067867 | -0.290400 |
| 146 | 7.286 | 0.066933 | -0.286167 |
| 147 | 7.337 | 0.065967 | -0.282033 |
| 148 | 7.387 | 0.065100 | -0.277967 |
| 149 | 7.437 | 0.064200 | -0.274000 |
| 150 | 7.487 | 0.063300 | -0.270100 |
| 151 | 7.538 | 0.062467 | -0.266267 |
| 152 | 7.588 | 0.061633 | -0.262533 |
| 153 | 7.638 | 0.060800 | -0.258867 |
| 154 | 7.688 | 0.060000 | -0.255267 |
| 155 | 7.739 | 0.059167 | -0.251767 |
| 156 | 7.789 | 0.058400 | -0.248300 |
| 157 | 7.839 | 0.057633 | -0.244933 |
| 158 | 7.889 | 0.056867 | -0.241600 |
| 159 | 7.940 | 0.056133 | -0.238333 |
| 160 | 7.990 | 0.055400 | -0.235167 |
| 161 | 8.040 | 0.054700 | -0.232033 |
| 162 | 8.090 | 0.053967 | -0.228933 |
| 163 | 8.141 | 0.053300 | -0.225933 |
| 164 | 8.191 | 0.052633 | -0.222967 |
| 165 | 8.241 | 0.051967 | -0.220067 |
| 166 | 8.291 | 0.051300 | -0.217200 |
| 167 | 8.342 | 0.050667 | -0.214400 |
| 168 | 8.392 | 0.050033 | -0.211633 |
| 169 | 8.442 | 0.049433 | -0.208933 |
| 170 | 8.492 | 0.048800 | -0.206267 |
| 171 | 8.543 | 0.048200 | -0.203667 |
| 172 | 8.593 | 0.047600 | -0.201100 |
| 173 | 8.643 | 0.047033 | -0.198600 |
| 174 | 8.693 | 0.046467 | -0.196100 |
| 175 | 8.744 | 0.045900 | -0.193667 |
| 176 | 8.794 | 0.045333 | -0.191300 |
| 177 | 8.844 | 0.044800 | -0.188933 |
| 178 | 8.894 | 0.044267 | -0.186633 |
| 179 | 8.945 | 0.043767 | -0.184367 |
| 180 | 8.995 | 0.043233 | -0.182133 |
| 181 | 9.045 | 0.042733 | -0.179933 |
| 182 | 9.095 | 0.042233 | -0.177767 |
| 183 | 9.146 | 0.041733 | -0.175633 |
| 184 | 9.196 | 0.041233 | -0.173533 |
| 185 | 9.246 | 0.040733 | -0.171500 |
| 186 | 9.296 | 0.040300 | -0.169467 |
| 187 | 9.347 | 0.039833 | -0.167467 |
| 188 | 9.397 | 0.039367 | -0.165500 |
| 189 | 9.447 | 0.038900 | -0.163600 |
| 190 | 9.497 | 0.038467 | -0.161700 |
| 191 | 9.548 | 0.038067 | -0.159833 |
| 192 | 9.598 | 0.037633 | -0.158000 |

---

---

|     |        |          |           |
|-----|--------|----------|-----------|
| 193 | 9.648  | 0.037167 | -0.156167 |
| 194 | 9.698  | 0.036767 | -0.154400 |
| 195 | 9.749  | 0.036367 | -0.152633 |
| 196 | 9.799  | 0.035967 | -0.150900 |
| 197 | 9.849  | 0.035567 | -0.149200 |
| 198 | 9.899  | 0.035200 | -0.147533 |
| 199 | 9.950  | 0.034800 | -0.145900 |
| 200 | 10.000 | 0.034400 | -0.144267 |

---

The scanning direction is found to be Z

FiPC-NICS is -6.362663 ppm, at 1.455 Angstrom

|    |       |           |           |
|----|-------|-----------|-----------|
| 1  | 0.000 | -6.307167 | -0.115500 |
| 2  | 0.050 | -6.284233 | -0.197233 |
| 3  | 0.101 | -6.215700 | -0.438067 |
| 4  | 0.151 | -6.102100 | -0.825567 |
| 5  | 0.201 | -5.944667 | -1.339900 |
| 6  | 0.251 | -5.745400 | -1.955900 |
| 7  | 0.302 | -5.507333 | -2.644800 |
| 8  | 0.352 | -5.234467 | -3.376367 |
| 9  | 0.402 | -4.931900 | -4.120933 |
| 10 | 0.452 | -4.605767 | -4.851167 |
| 11 | 0.503 | -4.262700 | -5.543200 |
| 12 | 0.553 | -3.909667 | -6.177767 |
| 13 | 0.603 | -3.553500 | -6.740267 |
| 14 | 0.653 | -3.200600 | -7.221000 |
| 15 | 0.704 | -2.856633 | -7.614867 |
| 16 | 0.754 | -2.526367 | -7.920633 |
| 17 | 0.804 | -2.213500 | -8.140467 |
| 18 | 0.854 | -1.920700 | -8.279033 |
| 19 | 0.905 | -1.649633 | -8.342900 |
| 20 | 0.955 | -1.401200 | -8.339900 |
| 21 | 1.005 | -1.175433 | -8.278367 |
| 22 | 1.055 | -0.971900 | -8.166867 |
| 23 | 1.106 | -0.789733 | -8.013800 |
| 24 | 1.156 | -0.627700 | -7.827067 |
| 25 | 1.206 | -0.484433 | -7.613867 |
| 26 | 1.256 | -0.358433 | -7.380733 |
| 27 | 1.307 | -0.248167 | -7.133400 |
| 28 | 1.357 | -0.152133 | -6.876833 |
| 29 | 1.407 | -0.068900 | -6.615200 |
| 30 | 1.457 | 0.002900  | -6.352033 |
| 31 | 1.508 | 0.064600  | -6.090133 |
| 32 | 1.558 | 0.117333  | -5.831867 |
| 33 | 1.608 | 0.162200  | -5.579000 |
| 34 | 1.658 | 0.200167  | -5.332967 |
| 35 | 1.709 | 0.232100  | -5.094733 |
| 36 | 1.759 | 0.258833  | -4.865133 |
| 37 | 1.809 | 0.281000  | -4.644567 |
| 38 | 1.859 | 0.299233  | -4.433400 |
| 39 | 1.910 | 0.314067  | -4.231667 |
| 40 | 1.960 | 0.325967  | -4.039433 |
| 41 | 2.010 | 0.335333  | -3.856567 |
| 42 | 2.060 | 0.342467  | -3.682867 |
| 43 | 2.111 | 0.347733  | -3.518100 |
| 44 | 2.161 | 0.351400  | -3.361967 |
| 45 | 2.211 | 0.353633  | -3.214133 |
| 46 | 2.261 | 0.354667  | -3.074267 |
| 47 | 2.312 | 0.354667  | -2.942000 |
| 48 | 2.362 | 0.353767  | -2.817000 |
| 49 | 2.412 | 0.352100  | -2.698833 |
| 50 | 2.462 | 0.349767  | -2.587200 |
| 51 | 2.513 | 0.346867  | -2.481733 |
| 52 | 2.563 | 0.343500  | -2.382067 |
| 53 | 2.613 | 0.339667  | -2.287900 |
| 54 | 2.663 | 0.335600  | -2.198900 |
| 55 | 2.714 | 0.331167  | -2.114767 |
| 56 | 2.764 | 0.326533  | -2.035200 |
| 57 | 2.814 | 0.321733  | -1.959933 |

---

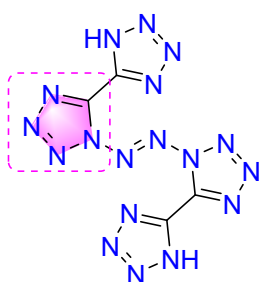

---

|     |       |          |           |
|-----|-------|----------|-----------|
| 58  | 2.864 | 0.316733 | -1.888700 |
| 59  | 2.915 | 0.311667 | -1.821267 |
| 60  | 2.965 | 0.306500 | -1.757367 |
| 61  | 3.015 | 0.301300 | -1.696833 |
| 62  | 3.065 | 0.296067 | -1.639400 |
| 63  | 3.116 | 0.290833 | -1.584900 |
| 64  | 3.166 | 0.285600 | -1.533167 |
| 65  | 3.216 | 0.280400 | -1.484033 |
| 66  | 3.266 | 0.275200 | -1.437300 |
| 67  | 3.317 | 0.270100 | -1.392867 |
| 68  | 3.367 | 0.265033 | -1.350567 |
| 69  | 3.417 | 0.260067 | -1.310267 |
| 70  | 3.467 | 0.255167 | -1.271867 |
| 71  | 3.518 | 0.250333 | -1.235233 |
| 72  | 3.568 | 0.245633 | -1.200267 |
| 73  | 3.618 | 0.240967 | -1.166867 |
| 74  | 3.668 | 0.236400 | -1.134933 |
| 75  | 3.719 | 0.231933 | -1.104400 |
| 76  | 3.769 | 0.227567 | -1.075200 |
| 77  | 3.819 | 0.223300 | -1.047200 |
| 78  | 3.869 | 0.219100 | -1.020400 |
| 79  | 3.920 | 0.215033 | -0.994667 |
| 80  | 3.970 | 0.211033 | -0.970000 |
| 81  | 4.020 | 0.207100 | -0.946300 |
| 82  | 4.070 | 0.203300 | -0.923533 |
| 83  | 4.121 | 0.199533 | -0.901667 |
| 84  | 4.171 | 0.195900 | -0.880600 |
| 85  | 4.221 | 0.192333 | -0.860333 |
| 86  | 4.271 | 0.188867 | -0.840800 |
| 87  | 4.322 | 0.185467 | -0.822000 |
| 88  | 4.372 | 0.182100 | -0.803867 |
| 89  | 4.422 | 0.178867 | -0.786333 |
| 90  | 4.472 | 0.175700 | -0.769467 |
| 91  | 4.523 | 0.172600 | -0.753133 |
| 92  | 4.573 | 0.169567 | -0.737367 |
| 93  | 4.623 | 0.166600 | -0.722133 |
| 94  | 4.673 | 0.163700 | -0.707367 |
| 95  | 4.724 | 0.160900 | -0.693100 |
| 96  | 4.774 | 0.158133 | -0.679300 |
| 97  | 4.824 | 0.155433 | -0.665900 |
| 98  | 4.874 | 0.152733 | -0.652933 |
| 99  | 4.925 | 0.150167 | -0.640333 |
| 100 | 4.975 | 0.147633 | -0.628133 |
| 101 | 5.025 | 0.145167 | -0.616300 |
| 102 | 5.075 | 0.142767 | -0.604800 |
| 103 | 5.126 | 0.140400 | -0.593633 |
| 104 | 5.176 | 0.138067 | -0.582800 |
| 105 | 5.226 | 0.135833 | -0.572267 |
| 106 | 5.276 | 0.133600 | -0.562000 |
| 107 | 5.327 | 0.131433 | -0.552033 |
| 108 | 5.377 | 0.129333 | -0.542333 |
| 109 | 5.427 | 0.127233 | -0.532900 |
| 110 | 5.477 | 0.125200 | -0.523700 |
| 111 | 5.528 | 0.123200 | -0.514733 |
| 112 | 5.578 | 0.121300 | -0.506000 |
| 113 | 5.628 | 0.119400 | -0.497500 |
| 114 | 5.678 | 0.117500 | -0.489200 |
| 115 | 5.729 | 0.115700 | -0.481133 |
| 116 | 5.779 | 0.113900 | -0.473233 |
| 117 | 5.829 | 0.112167 | -0.465533 |
| 118 | 5.879 | 0.110433 | -0.458033 |
| 119 | 5.930 | 0.108767 | -0.450700 |
| 120 | 5.980 | 0.107100 | -0.443533 |
| 121 | 6.030 | 0.105500 | -0.436533 |
| 122 | 6.080 | 0.103933 | -0.429700 |
| 123 | 6.131 | 0.102367 | -0.423000 |
| 124 | 6.181 | 0.100833 | -0.416467 |

---

---

|     |       |          |           |
|-----|-------|----------|-----------|
| 125 | 6.231 | 0.099367 | -0.410067 |
| 126 | 6.281 | 0.097900 | -0.403833 |
| 127 | 6.332 | 0.096467 | -0.397733 |
| 128 | 6.382 | 0.095067 | -0.391733 |
| 129 | 6.432 | 0.093700 | -0.385900 |
| 130 | 6.482 | 0.092367 | -0.380167 |
| 131 | 6.533 | 0.091033 | -0.374533 |
| 132 | 6.583 | 0.089733 | -0.369067 |
| 133 | 6.633 | 0.088433 | -0.363667 |
| 134 | 6.683 | 0.087200 | -0.358400 |
| 135 | 6.734 | 0.085967 | -0.353233 |
| 136 | 6.784 | 0.084767 | -0.348200 |
| 137 | 6.834 | 0.083600 | -0.343233 |
| 138 | 6.884 | 0.082433 | -0.338367 |
| 139 | 6.935 | 0.081300 | -0.333600 |
| 140 | 6.985 | 0.080200 | -0.328933 |
| 141 | 7.035 | 0.079100 | -0.324333 |
| 142 | 7.085 | 0.078033 | -0.319833 |
| 143 | 7.136 | 0.076967 | -0.315433 |
| 144 | 7.186 | 0.075933 | -0.311100 |
| 145 | 7.236 | 0.074900 | -0.306867 |
| 146 | 7.286 | 0.073900 | -0.302700 |
| 147 | 7.337 | 0.072900 | -0.298600 |
| 148 | 7.387 | 0.071967 | -0.294600 |
| 149 | 7.437 | 0.070967 | -0.290633 |
| 150 | 7.487 | 0.070067 | -0.286767 |
| 151 | 7.538 | 0.069133 | -0.282967 |
| 152 | 7.588 | 0.068233 | -0.279233 |
| 153 | 7.638 | 0.067333 | -0.275567 |
| 154 | 7.688 | 0.066467 | -0.271967 |
| 155 | 7.739 | 0.065633 | -0.268433 |
| 156 | 7.789 | 0.064767 | -0.264933 |
| 157 | 7.839 | 0.063967 | -0.261533 |
| 158 | 7.889 | 0.063133 | -0.258167 |
| 159 | 7.940 | 0.062333 | -0.254867 |
| 160 | 7.990 | 0.061533 | -0.251600 |
| 161 | 8.040 | 0.060767 | -0.248400 |
| 162 | 8.090 | 0.060000 | -0.245267 |
| 163 | 8.141 | 0.059233 | -0.242200 |
| 164 | 8.191 | 0.058500 | -0.239133 |
| 165 | 8.241 | 0.057800 | -0.236167 |
| 166 | 8.291 | 0.057067 | -0.233233 |
| 167 | 8.342 | 0.056367 | -0.230333 |
| 168 | 8.392 | 0.055667 | -0.227500 |
| 169 | 8.442 | 0.054967 | -0.224700 |
| 170 | 8.492 | 0.054333 | -0.221933 |
| 171 | 8.543 | 0.053667 | -0.219233 |
| 172 | 8.593 | 0.053000 | -0.216567 |
| 173 | 8.643 | 0.052367 | -0.213933 |
| 174 | 8.693 | 0.051733 | -0.211367 |
| 175 | 8.744 | 0.051133 | -0.208833 |
| 176 | 8.794 | 0.050500 | -0.206333 |
| 177 | 8.844 | 0.049900 | -0.203867 |
| 178 | 8.894 | 0.049333 | -0.201433 |
| 179 | 8.945 | 0.048733 | -0.199067 |
| 180 | 8.995 | 0.048133 | -0.196700 |
| 181 | 9.045 | 0.047600 | -0.194400 |
| 182 | 9.095 | 0.047033 | -0.192100 |
| 183 | 9.146 | 0.046467 | -0.189867 |
| 184 | 9.196 | 0.045967 | -0.187667 |
| 185 | 9.246 | 0.045433 | -0.185467 |
| 186 | 9.296 | 0.044867 | -0.183333 |
| 187 | 9.347 | 0.044367 | -0.181233 |
| 188 | 9.397 | 0.043833 | -0.179133 |
| 189 | 9.447 | 0.043367 | -0.177100 |
| 190 | 9.497 | 0.042867 | -0.175067 |
| 191 | 9.548 | 0.042400 | -0.173067 |

---

|     |        |          |           |
|-----|--------|----------|-----------|
| 192 | 9.598  | 0.041900 | -0.171100 |
| 193 | 9.648  | 0.041433 | -0.169167 |
| 194 | 9.698  | 0.040967 | -0.167267 |
| 195 | 9.749  | 0.040500 | -0.165400 |
| 196 | 9.799  | 0.040033 | -0.163533 |
| 197 | 9.849  | 0.039600 | -0.161733 |
| 198 | 9.899  | 0.039167 | -0.159933 |
| 199 | 9.950  | 0.038733 | -0.158167 |
| 200 | 10.000 | 0.038300 | -0.156400 |

<sup>a</sup> *Inorg. Chem.* **2014**, *53*(7), 3579-3585. <sup>b</sup> Column 1: Point index; Column 2: Scanning distance in Angstrom; Column 3: In-plane component of NICS; Column 4: Out-of-plane component of NICS.

**Table S6** Geometric optimization structure (at M06-2X/6-311g+(2d,p) level)

| No.         | geometric optimization structure                                                    |             |                                                                                     |             |             |             |             |
|-------------|-------------------------------------------------------------------------------------|-------------|-------------------------------------------------------------------------------------|-------------|-------------|-------------|-------------|
| <b>I</b>    | 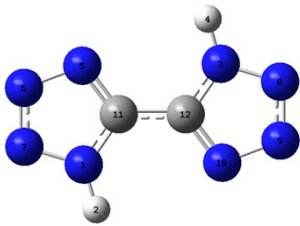   | N           | -1.32554100                                                                         | -0.90719500 | 0.91582500  |             |             |
|             |                                                                                     | H           | -1.25409400                                                                         | -0.74692100 | 1.91098600  |             |             |
|             |                                                                                     | N           | 1.32554100                                                                          | 0.90719500  | -0.91582500 |             |             |
|             |                                                                                     | H           | 1.25409400                                                                          | 0.74692100  | -1.91098600 |             |             |
|             |                                                                                     | N           | -1.02877900                                                                         | -0.91145200 | -1.21239800 |             |             |
|             |                                                                                     | N           | -2.08811800                                                                         | -1.68052600 | -0.87967500 |             |             |
|             |                                                                                     | N           | -2.27413400                                                                         | -1.68523900 | 0.38748900  |             |             |
|             |                                                                                     | N           | 2.27413400                                                                          | 1.68523900  | -0.38748900 |             |             |
|             |                                                                                     | N           | 2.08811800                                                                          | 1.68052600  | 0.87967500  |             |             |
|             |                                                                                     | N           | 1.02877900                                                                          | 0.91145200  | 1.21239800  |             |             |
|             |                                                                                     | C           | -0.56747900                                                                         | -0.43942600 | -0.08179300 |             |             |
|             |                                                                                     | C           | 0.56747900                                                                          | 0.43942600  | 0.08179300  |             |             |
|             |                                                                                     | <b>I-01</b> |  | N           | -1.56253900 | -0.78116900 | 0.68795900  |
|             |                                                                                     |             |                                                                                     | N           | 1.56253900  | 0.78116900  | -0.68795900 |
| N           | -0.64699500                                                                         |             |                                                                                     | -1.23105800 | -1.19191000 |             |             |
| N           | -1.76502600                                                                         |             |                                                                                     | -1.97331000 | -1.01412900 |             |             |
| N           | -2.32130000                                                                         |             |                                                                                     | -1.71114200 | 0.10336600  |             |             |
| N           | 2.32130000                                                                          |             |                                                                                     | 1.71114200  | -0.10336600 |             |             |
| N           | 1.76502600                                                                          |             |                                                                                     | 1.97331000  | 1.01412900  |             |             |
| N           | 0.64699500                                                                          |             |                                                                                     | 1.23105800  | 1.19191000  |             |             |
| C           | -0.51392100                                                                         |             |                                                                                     | -0.49728400 | -0.12065200 |             |             |
| C           | 0.51392100                                                                          |             |                                                                                     | 0.49728400  | 0.12065200  |             |             |
| N           | 1.84241900                                                                          |             |                                                                                     | 0.44308100  | -2.08708300 |             |             |
| N           | -1.84241900                                                                         |             |                                                                                     | -0.44308100 | 2.08708300  |             |             |
| O           | -2.97797300                                                                         |             |                                                                                     | -0.16763300 | 2.29896500  |             |             |
| O           | -0.89888000                                                                         |             |                                                                                     | -0.52072000 | 2.80593600  |             |             |
| <b>I-02</b> |  | N           | -1.81730400                                                                         | 0.34269500  | 0.15811600  |             |             |
|             |                                                                                     | N           | 1.81730400                                                                          | -0.34269500 | -0.15811600 |             |             |
|             |                                                                                     | N           | -0.74536700                                                                         | -0.04298600 | -1.66865300 |             |             |
|             |                                                                                     | N           | -2.07216100                                                                         | 0.14959900  | -1.91623400 |             |             |
|             |                                                                                     | N           | -2.71526600                                                                         | 0.36813900  | -0.84225900 |             |             |
|             |                                                                                     | N           | 2.71526600                                                                          | -0.36813900 | 0.84225900  |             |             |
|             |                                                                                     | N           | 2.07216100                                                                          | -0.14959900 | 1.91623400  |             |             |
|             |                                                                                     | N           | 0.74536700                                                                          | 0.04298600  | 1.66865300  |             |             |
|             |                                                                                     | C           | -0.60938100                                                                         | 0.06810400  | -0.37875100 |             |             |
|             |                                                                                     | C           | 0.60938100                                                                          | -0.06810400 | 0.37875100  |             |             |
|             |                                                                                     | N           | -2.21191400                                                                         | 0.44496400  | 1.45818100  |             |             |
|             |                                                                                     | H           | -1.63560400                                                                         | 1.09390000  | 1.99395200  |             |             |
|             |                                                                                     | N           | 2.21191400                                                                          | -0.44496400 | -1.45818100 |             |             |
|             |                                                                                     | H           | 1.63560400                                                                          | -1.09390000 | -1.99395200 |             |             |
| N           | -2.13186900                                                                         | -0.82557200 | 2.15580200                                                                          |             |             |             |             |
| N           | 2.13186900                                                                          | 0.82557200  | -2.15580200                                                                         |             |             |             |             |

|  |   |             |             |             |
|--|---|-------------|-------------|-------------|
|  | O | -2.18216300 | -0.71287600 | 3.34363300  |
|  | O | -2.06836800 | -1.80991900 | 1.47775200  |
|  | O | 2.06836800  | 1.80991900  | -1.47775200 |
|  | O | 2.18216300  | 0.71287600  | -3.34363300 |
|  | N | -1.84107300 | 0.22613500  | 0.21530400  |
|  | N | 1.84107300  | -0.22613500 | -0.21530400 |
|  | N | -0.74557300 | 0.31728400  | -1.63242000 |
|  | N | -2.07657000 | 0.53026000  | -1.84860200 |
|  | N | -2.73314500 | 0.48133100  | -0.76624500 |
|  | N | 2.73314500  | -0.48133100 | 0.76624500  |
|  | N | 2.07657000  | -0.53026000 | 1.84860200  |
|  | N | 0.74557300  | -0.31728400 | 1.63242000  |
|  | C | -0.61511000 | 0.12904100  | -0.35452800 |
|  | C | 0.61511000  | -0.12904100 | 0.35452800  |
|  | N | -2.26207100 | 0.09506900  | 1.49197600  |
|  | N | 2.26207100  | -0.09506900 | -1.49197600 |
|  | N | -2.11279200 | -1.32602000 | 1.98540800  |
|  | N | 2.11279200  | 1.32602000  | -1.98540800 |
|  | O | -1.68866700 | -2.08831600 | 1.17253200  |
|  | O | -2.51153700 | -1.50304900 | 3.08428000  |
|  | O | 2.51153700  | 1.50304900  | -3.08428000 |
|  | O | 1.68866700  | 2.08831600  | -1.17253200 |
|  | N | -1.60835500 | 1.12967500  | 2.39371200  |
|  | N | 1.60835500  | -1.12967500 | -2.39371200 |
|  | O | -1.64641200 | 0.90016800  | 3.54983700  |
|  | O | -1.20098900 | 2.07089800  | 1.78907900  |
|  | O | 1.20098900  | -2.07089800 | -1.78907900 |
|  | O | 1.64641200  | -0.90016800 | -3.54983700 |
|  | N | -1.65142400 | -0.66052700 | 0.58540800  |
|  | N | 1.65142400  | 0.66052700  | -0.58540800 |
|  | N | -0.49994100 | -1.37148200 | -1.08812600 |
|  | N | -1.63742900 | -2.09673400 | -0.95786900 |
|  | N | -2.32850000 | -1.69524100 | 0.02412600  |
|  | N | 2.32850000  | 1.69524100  | -0.02412600 |
|  | N | 1.63742900  | 2.09673400  | 0.95786900  |
|  | N | 0.49994100  | 1.37148200  | 1.08812600  |
|  | C | -0.51480900 | -0.49169200 | -0.13023000 |
|  | C | 0.51480900  | 0.49169200  | 0.13023000  |
|  | N | -3.46448900 | -0.64722800 | 2.14849100  |
|  | N | 3.46448900  | 0.64722800  | -2.14849100 |
|  | O | -3.35609000 | -1.47905200 | 3.00192000  |
|  | O | -4.43472100 | -0.27489800 | 1.55612900  |
|  | O | 4.43472100  | 0.27489800  | -1.55612900 |
|  | O | 3.35609000  | 1.47905200  | -3.00192000 |
|  | N | -1.16733200 | -0.09295700 | 2.91079100  |
|  | N | 1.16733200  | 0.09295700  | -2.91079100 |
|  | O | -0.32758900 | -0.94044700 | 2.78430900  |
|  | O | -1.38110600 | 0.63065300  | 3.83361000  |
|  | O | 1.38110600  | -0.63065300 | -3.83361000 |
|  | O | 0.32758900  | 0.94044700  | -2.78430900 |
|  | C | -2.14659500 | 0.02206700  | 1.71056600  |
|  | C | 2.14659500  | -0.02206700 | -1.71056600 |
|  | N | -2.49580500 | 1.49248200  | 1.38707400  |
|  | N | 2.49580500  | -1.49248200 | -1.38707400 |
|  | O | -2.25118900 | 1.84545000  | 0.26612300  |
|  | O | -3.00849500 | 2.10098600  | 2.27762300  |
|  | O | 3.00849500  | -2.10098600 | -2.27762300 |

I-03

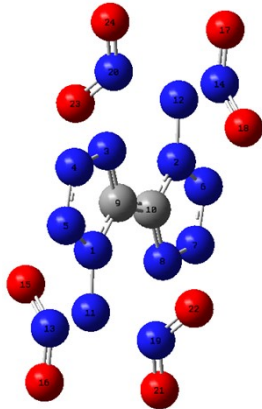

I-04

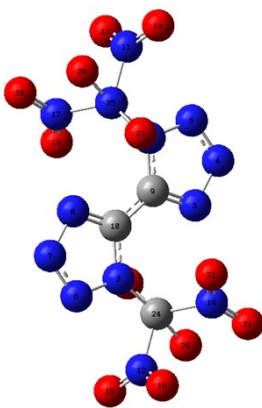

|             |                                                                                     |             |             |             |             |
|-------------|-------------------------------------------------------------------------------------|-------------|-------------|-------------|-------------|
| <b>I-05</b> | 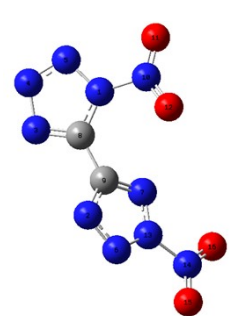   | O           | 2.25118900  | -1.84545000 | -0.26612300 |
|             |                                                                                     | N           | -2.16758000 | 0.14629000  | -0.07073000 |
|             |                                                                                     | N           | 0.87675600  | -1.59993900 | 0.94097600  |
|             |                                                                                     | N           | -1.88261400 | -1.94214300 | -0.43290300 |
|             |                                                                                     | N           | -3.19088300 | -1.59329700 | -0.58856400 |
|             |                                                                                     | N           | -3.37161200 | -0.35329200 | -0.37665700 |
|             |                                                                                     | N           | 2.11418200  | -1.24796300 | 0.85959600  |
|             |                                                                                     | N           | 0.96689400  | 0.11792400  | -0.47632900 |
|             |                                                                                     | C           | -1.24973600 | -0.85629200 | -0.09862200 |
|             |                                                                                     | C           | 0.18927100  | -0.75596700 | 0.12427000  |
|             |                                                                                     | N           | -2.03741800 | 1.51839100  | 0.35773400  |
|             |                                                                                     | O           | -2.94889000 | 2.22347400  | 0.07481800  |
|             |                                                                                     | O           | -1.02235300 | 1.75105700  | 0.94711800  |
|             |                                                                                     | N           | 2.12846200  | -0.23320900 | 0.01457000  |
|             |                                                                                     | N           | 3.37181400  | 0.45909800  | -0.34841300 |
|             |                                                                                     | O           | 4.33633800  | 0.03635800  | 0.19949700  |
| O           | 3.22325200                                                                          | 1.33542900  | -1.13503800 |             |             |
| <b>I-06</b> |   | N           | 2.20879200  | -0.17028800 | -0.59574400 |
|             |                                                                                     | N           | -0.32717000 | 2.28321700  | 0.62776700  |
|             |                                                                                     | N           | 2.59226100  | 1.87849000  | -0.05776000 |
|             |                                                                                     | N           | 3.73150200  | 1.26259300  | -0.48367100 |
|             |                                                                                     | N           | 3.52031700  | 0.04898500  | -0.79469100 |
|             |                                                                                     | N           | -1.55661400 | 2.00225000  | 0.87162600  |
|             |                                                                                     | N           | -0.58552000 | 0.10955300  | 0.22867800  |
|             |                                                                                     | C           | 1.65801400  | 0.97763000  | -0.12248500 |
|             |                                                                                     | C           | 0.25918700  | 1.11808300  | 0.23773000  |
|             |                                                                                     | N           | -1.69279000 | 0.70441600  | 0.64143500  |
|             |                                                                                     | N           | 1.67887700  | -1.40624900 | -0.79964500 |
|             |                                                                                     | H           | 0.86472900  | -1.40996100 | -1.41029900 |
|             |                                                                                     | N           | 1.28684400  | -2.06479900 | 0.41612700  |
|             |                                                                                     | N           | -2.89756600 | 0.08727200  | 0.74866200  |
|             |                                                                                     | H           | -2.84460000 | -0.78999200 | 1.26381400  |
|             |                                                                                     | N           | -3.47712500 | -0.20926000 | -0.54414900 |
| O           | 1.78656400                                                                          | -1.67663600 | 1.43101700  |             |             |
| O           | 0.51171200                                                                          | -2.96401900 | 0.24206200  |             |             |
| O           | -3.10922900                                                                         | 0.46095800  | -1.46209400 |             |             |
| O           | -4.30104500                                                                         | -1.07750000 | -0.50541500 |             |             |
| <b>I-07</b> |  | N           | -2.72975800 | 0.30339200  | 0.10154700  |
|             |                                                                                     | N           | 0.40651400  | 2.34624500  | -0.09347800 |
|             |                                                                                     | N           | -2.58027400 | 2.44939800  | 0.17572700  |
|             |                                                                                     | N           | -3.88477900 | 2.04567300  | 0.25217800  |
|             |                                                                                     | N           | -3.98887800 | 0.78561300  | 0.21282100  |
|             |                                                                                     | N           | 1.59277700  | 1.87280800  | -0.14115500 |
|             |                                                                                     | N           | 0.21516700  | 0.12729500  | -0.01783100 |
|             |                                                                                     | C           | -1.87538300 | 1.36570200  | 0.08098200  |
|             |                                                                                     | C           | -0.43062300 | 1.26965800  | -0.00980200 |
|             |                                                                                     | N           | 1.46449400  | 0.54593000  | -0.10289600 |
|             |                                                                                     | N           | -2.54129500 | -1.02941600 | 0.02555800  |
|             |                                                                                     | N           | -2.06136900 | -1.46934100 | -1.33075900 |
|             |                                                                                     | N           | 2.50887000  | -0.31558900 | -0.08759700 |
|             |                                                                                     | N           | 3.46208400  | 0.04070800  | -1.20892600 |
|             |                                                                                     | O           | -2.01194300 | -2.64394800 | -1.47155100 |
|             |                                                                                     | O           | -1.86834200 | -0.58147600 | -2.10456600 |
| O           | 2.89617400                                                                          | 0.18025300  | -2.24312500 |             |             |
| O           | 4.61024800                                                                          | 0.09672500  | -0.92479600 |             |             |
| N           | -1.69794900                                                                         | -1.54354200 | 1.16270300  |             |             |
| N           | 3.20105100                                                                          | -0.32368000 | 1.26017600  |             |             |

|  |   |             |             |             |
|--|---|-------------|-------------|-------------|
|  | O | -1.73719300 | -0.83618400 | 2.11984200  |
|  | O | -1.15750300 | -2.58085000 | 0.98595400  |
|  | O | 4.03841200  | -1.15736600 | 1.34194900  |
|  | O | 2.76382900  | 0.44027000  | 2.06085100  |
|  | N | -2.48714200 | -0.95132500 | 0.10802700  |
|  | N | 0.66808500  | -2.17861600 | -1.23845000 |
|  | N | -1.91628600 | -3.01879000 | 0.33933000  |
|  | N | -3.23218400 | -2.85136000 | 0.63784300  |
|  | N | -3.58397000 | -1.64415300 | 0.52469700  |
|  | N | 1.84275000  | -1.67700100 | -1.18914700 |
|  | N | 0.65169200  | -0.68876400 | 0.41587800  |
|  | C | -1.45491000 | -1.84600500 | 0.03318400  |
|  | C | -0.05165600 | -1.56402500 | -0.25690000 |
|  | N | 1.83027900  | -0.79949200 | -0.18007800 |
|  | N | -3.01639800 | 1.03966000  | 1.35193300  |
|  | N | 3.23341200  | 0.85679700  | -1.24109600 |
|  | O | -3.91472100 | 1.82853500  | 1.36688800  |
|  | O | -2.34901800 | 0.62016800  | 2.25525000  |
|  | O | 4.39025600  | 1.05405400  | -1.47470400 |
|  | O | 2.25903800  | 1.18975500  | -1.85152700 |
|  | N | -1.34616900 | 1.12020700  | -0.50076700 |
|  | N | 2.56023200  | 1.07336800  | 1.15819000  |
|  | O | -0.97603000 | 0.72156900  | -1.57532600 |
|  | O | -0.86629100 | 1.95571200  | 0.20354300  |
|  | O | 2.42672100  | 0.56873800  | 2.23607600  |
|  | O | 2.46724700  | 2.21944500  | 0.82891600  |
|  | C | -2.62733000 | 0.44209400  | -0.01860900 |
|  | C | 2.91793100  | 0.07298700  | 0.05329600  |
|  | N | -3.68213200 | 0.87029700  | -1.07190500 |
|  | N | 4.19709300  | -0.64254900 | 0.51285200  |
|  | O | -3.59661400 | 2.02609200  | -1.38350600 |
|  | O | -4.43895900 | 0.03184000  | -1.45754000 |
|  | O | 4.27813100  | -1.80471200 | 0.23676100  |
|  | O | 4.97786000  | 0.06527000  | 1.08304800  |
|  | N | 1.11330700  | 1.50106200  | 0.00005100  |
|  | N | -1.11328400 | -1.50101800 | -0.00039500 |
|  | N | 1.70278600  | -0.64925400 | -0.00009000 |
|  | N | 2.40004900  | 1.47086500  | 0.00006600  |
|  | N | -2.39999900 | -1.47086600 | -0.00030700 |
|  | N | -1.70281300 | 0.64928700  | 0.00017000  |
|  | C | 0.69894800  | 0.20152200  | -0.00003900 |
|  | C | -0.69896000 | -0.20144400 | -0.00008300 |
|  | N | -2.71318900 | -0.18613400 | 0.00006000  |
|  | N | -4.10290200 | 0.27139000  | 0.00008200  |
|  | O | -4.90259700 | -0.60814700 | 0.00047300  |
|  | O | -4.22516600 | 1.45275600  | -0.00025900 |
|  | N | 2.71317600  | 0.18614500  | -0.00005500 |
|  | N | 4.10290000  | -0.27142800 | 0.00005600  |
|  | O | 4.22512600  | -1.45279600 | 0.00032200  |
|  | O | 4.90261800  | 0.60808500  | -0.00012700 |

I-08

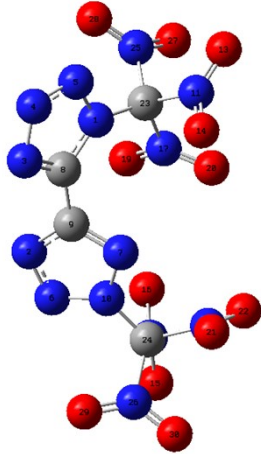

I-09

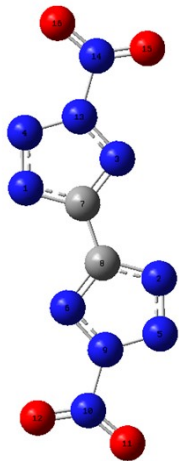

I-10

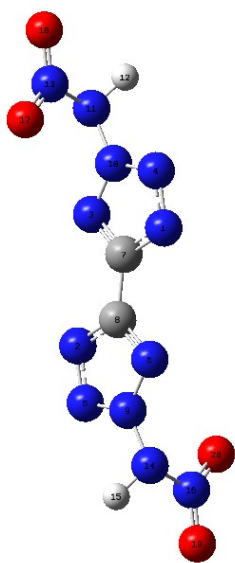

|   |             |             |             |
|---|-------------|-------------|-------------|
| N | -1.82555900 | -0.38232600 | 0.08684600  |
| N | 1.82555900  | 0.38232600  | -0.08684600 |
| N | -0.71236300 | 0.63624000  | -1.55196300 |
| N | -2.68341900 | -0.10161000 | -0.82670100 |
| N | 2.68341900  | 0.10161000  | 0.82670100  |
| N | 0.71236300  | -0.63624000 | 1.55196300  |
| C | -0.62290800 | 0.06660300  | -0.37023100 |
| C | 0.62290800  | -0.06660300 | 0.37023100  |
| N | 2.00341000  | -0.51667900 | 1.78591600  |
| N | -2.00341000 | 0.51667900  | -1.78591600 |
| N | -2.57095100 | 0.92064700  | -2.95429100 |
| H | -3.46879300 | 1.37676400  | -2.80550000 |
| N | -2.80365600 | -0.18385500 | -3.85915100 |
| N | 2.57095100  | -0.92064700 | 2.95429100  |
| H | 3.46879300  | -1.37676400 | 2.80550000  |
| N | 2.80365600  | 0.18385500  | 3.85915100  |
| O | -2.12087700 | -1.15204000 | -3.71150900 |
| O | -3.63789000 | 0.05049100  | -4.68828700 |
| O | 3.63789000  | -0.05049100 | 4.68828700  |
| O | 2.12087700  | 1.15204000  | 3.71150900  |

I-11

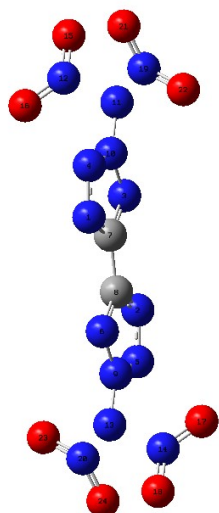

|   |             |             |             |
|---|-------------|-------------|-------------|
| N | -1.84119300 | -0.33310800 | 0.01630800  |
| N | 1.84119300  | 0.33310800  | -0.01630800 |
| N | -0.61697600 | 0.57795600  | -1.61053100 |
| N | -2.64612400 | -0.07832700 | -0.94323400 |
| N | 2.64612400  | 0.07832700  | 0.94323400  |
| N | 0.61697600  | -0.57795600 | 1.61053100  |
| C | -0.60114400 | 0.06396100  | -0.40428600 |
| C | 0.60114400  | -0.06396100 | 0.40428600  |
| N | 1.90167000  | -0.47162100 | 1.90333800  |
| N | -1.90167000 | 0.47162100  | -1.90333800 |
| N | -2.39135400 | 0.85269400  | -3.10640200 |
| N | -2.67888100 | -0.33606500 | -3.99520900 |
| N | 2.39135400  | -0.85269400 | 3.10640200  |
| N | 2.67888100  | 0.33606500  | 3.99520900  |
| O | -2.97210000 | -0.02434800 | -5.10075600 |
| O | -2.50057800 | -1.40274800 | -3.49785700 |
| O | 2.50057800  | 1.40274800  | 3.49785700  |
| O | 2.97210000  | 0.02434800  | 5.10075600  |
| N | -3.62436700 | 1.69716500  | -2.89635300 |
| N | 3.62436700  | -1.69716500 | 2.89635300  |
| O | -4.57355200 | 1.41817700  | -3.54925200 |
| O | -3.44111900 | 2.56449000  | -2.10584100 |
| O | 3.44111900  | -2.56449000 | 2.10584100  |
| O | 4.57355200  | -1.41817700 | 3.54925200  |

I-12

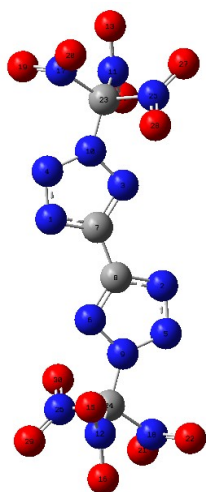

|   |             |             |             |
|---|-------------|-------------|-------------|
| N | -1.81684800 | 0.35883600  | 0.26574500  |
| N | 1.81684800  | -0.35883600 | -0.26574500 |
| N | -0.67957500 | 0.35467800  | -1.64832100 |
| N | -2.65511100 | 0.65660300  | -0.64761800 |
| N | 2.65511100  | -0.65660300 | 0.64761800  |
| N | 0.67957500  | -0.35467800 | 1.64832100  |
| C | -0.61144900 | 0.17516100  | -0.35235800 |
| C | 0.61144900  | -0.17516100 | 0.35235800  |
| N | 1.96673900  | -0.62679800 | 1.79961300  |
| N | -1.96673900 | 0.62679800  | -1.79961300 |
| N | -2.45697100 | -0.03397400 | -4.12865900 |
| N | 2.45697100  | 0.03397400  | 4.12865900  |
| O | -3.22168700 | 0.15310100  | -5.03244500 |
| O | -1.66953500 | -0.92087800 | -3.96576700 |
| O | 1.66953500  | 0.92087800  | 3.96576700  |
| O | 3.22168700  | -0.15310100 | 5.03244500  |
| N | -3.97018800 | 1.43299500  | -2.86985000 |
| N | 3.97018800  | -1.43299500 | 2.86985000  |
| O | -4.68517400 | 0.50447600  | -2.62458100 |
| O | -4.23703400 | 2.59073200  | -3.01340000 |
| O | 4.23703400  | -2.59073200 | 3.01340000  |
| O | 4.68517400  | -0.50447600 | 2.62458100  |
| C | -2.49607800 | 1.04714000  | -3.03587200 |
| C | 2.49607800  | -1.04714000 | 3.03587200  |
| N | -1.71052400 | 2.27791600  | -3.54137100 |
| N | 1.71052400  | -2.27791600 | 3.54137100  |
| O | -1.49797900 | 2.32960000  | -4.71787000 |
| O | -1.41401900 | 3.05090000  | -2.67571100 |
| O | 1.49797900  | -2.32960000 | 4.71787000  |
| O | 1.41401900  | -3.05090000 | 2.67571100  |

II

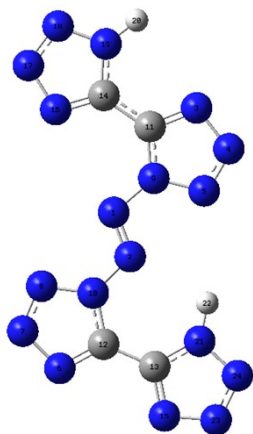

|   |             |             |             |
|---|-------------|-------------|-------------|
| N | -0.54659600 | -0.30504400 | -0.00011300 |
| N | 0.66158400  | -0.08329800 | -0.00011300 |
| N | -2.85777200 | 2.29146600  | 0.00004700  |
| N | -1.66287600 | 2.93247600  | 0.00002100  |
| N | -0.69227000 | 2.11061400  | -0.00011300 |
| N | 3.21341300  | -2.39018800 | 0.00006600  |
| N | 2.09304900  | -3.17188400 | 0.00005200  |
| N | 1.02524200  | -2.48520100 | -0.00002100 |
| N | -1.24334600 | 0.87706100  | -0.00014100 |
| N | 1.43005300  | -1.19427100 | -0.00005800 |
| C | -2.58741800 | 1.01323800  | -0.00006200 |
| C | 2.79100900  | -1.16056500 | 0.00005100  |
| C | 3.59510000  | 0.04932100  | 0.00003900  |
| C | -3.59454200 | -0.02603300 | -0.00001600 |
| N | 4.90545700  | 0.07897300  | 0.00019200  |
| N | -3.44830900 | -1.32671400 | -0.00025900 |
| N | -4.70053200 | -1.82896400 | -0.00012700 |
| N | -5.57657900 | -0.89075600 | 0.00023100  |
| N | -4.90577300 | 0.25762600  | 0.00029500  |
| H | -5.37321200 | 1.15440800  | 0.00059300  |
| N | 3.14411400  | 1.31759700  | -0.00009200 |
| H | 2.19932400  | 1.68219200  | -0.00023600 |
| N | 5.24125700  | 1.38142500  | 0.00010500  |
| N | 4.19831200  | 2.13017200  | -0.00003500 |

II-01

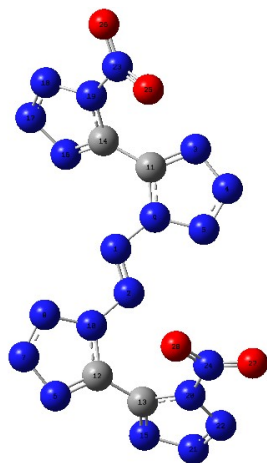

|   |             |             |             |
|---|-------------|-------------|-------------|
| N | -0.28242200 | -0.45041900 | -0.08242600 |
| N | 0.93387800  | -0.32604900 | -0.18387100 |
| N | -2.52870800 | 2.05863100  | -0.90340800 |
| N | -1.33416700 | 2.70744700  | -0.87268500 |
| N | -0.37273500 | 1.91506100  | -0.60889500 |
| N | 3.29340200  | -2.68250900 | 0.69656800  |
| N | 2.11532400  | -3.29785400 | 1.01373700  |
| N | 1.10964100  | -2.56843300 | 0.74369300  |
| N | -0.92721300 | 0.69795500  | -0.45634700 |
| N | 1.61168100  | -1.43104200 | 0.22614500  |
| C | -2.26284800 | 0.81462300  | -0.63136900 |
| C | 2.96305900  | -1.52279500 | 0.21704100  |
| C | 3.86118100  | -0.50409200 | -0.31434100 |
| C | -3.18814400 | -0.30758000 | -0.63036800 |
| N | 4.74143500  | -0.69930900 | -1.25074100 |
| N | -3.01205100 | -1.42392200 | -1.27730500 |
| N | -4.14420100 | -2.15550200 | -1.09067800 |
| N | -4.99052200 | -1.52780600 | -0.37679400 |
| N | -4.42389300 | -0.35573800 | -0.07548200 |
| N | 3.91708100  | 0.81437500  | 0.01810100  |
| N | 5.34188000  | 0.50496300  | -1.46926400 |
| N | 4.85879400  | 1.41088200  | -0.71969000 |
| N | -5.06431900 | 0.55207600  | 0.85833100  |
| N | 3.22176800  | 1.53902100  | 1.05094600  |
| O | -4.30803200 | 1.31038600  | 1.38672400  |
| O | -6.23563000 | 0.40805000  | 0.97003900  |
| O | 3.38236200  | 2.71182000  | 1.04824700  |
| O | 2.57479400  | 0.83802900  | 1.77932400  |

II-02

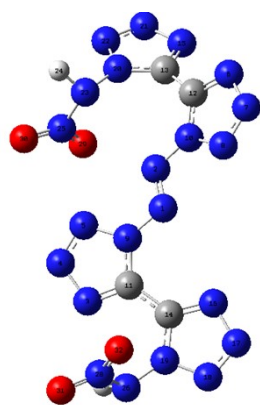

|   |             |             |             |
|---|-------------|-------------|-------------|
| N | 0.09708100  | -0.74907100 | -0.16610600 |
| N | -1.10354300 | -0.49304000 | -0.12543800 |
| N | 2.51919700  | 1.63403700  | 0.55113000  |
| N | 1.42201900  | 2.37878200  | 0.25759200  |
| N | 0.41753000  | 1.64260300  | 0.00394500  |
| N | -3.59582800 | -2.79618900 | -0.80611200 |
| N | -2.45527600 | -3.44379600 | -1.17540000 |
| N | -1.42202800 | -2.73041300 | -0.98486800 |
| N | 0.83970600  | 0.36799600  | 0.12522500  |
| N | -1.86768500 | -1.56312700 | -0.47663300 |
| C | 2.14855200  | 0.38482200  | 0.45268100  |
| C | -3.22169500 | -1.62610600 | -0.37873300 |
| C | -4.12625200 | -0.61425500 | 0.15219700  |
| C | 3.00874700  | -0.75246600 | 0.69384500  |
| N | -5.13606900 | -0.86835100 | 0.93582500  |
| N | 2.68477400  | -1.99023100 | 0.92463500  |
| N | 3.86389400  | -2.65063600 | 1.09600500  |
| N | 4.85895500  | -1.86573100 | 0.98222500  |
| N | 4.35908600  | -0.64391900 | 0.74770600  |
| N | -4.15287100 | 0.70503200  | -0.14741500 |
| N | -5.77515300 | 0.31566300  | 1.11977900  |
| N | -5.20031000 | 1.25732300  | 0.48677300  |
| N | -3.27645200 | 1.43502500  | -0.89217300 |
| H | -3.75686700 | 2.02122600  | -1.57392700 |
| N | -2.49487100 | 2.34804000  | -0.06422400 |
| N | 5.18574600  | 0.41004500  | 0.49513200  |
| H | 4.92981800  | 1.24227400  | 1.02658900  |
| N | 5.15962300  | 0.80772600  | -0.89683300 |
| O | -2.34858300 | 2.04084500  | 1.07894200  |

|  |   |             |             |             |
|--|---|-------------|-------------|-------------|
|  | O | -2.06269000 | 3.28007100  | -0.67691800 |
|  | O | 5.63399200  | 1.88874200  | -1.08630900 |
|  | O | 4.71206100  | 0.01911400  | -1.67921400 |
|  | N | 0.20797000  | -1.00493200 | -0.31701600 |
|  | N | 1.40319400  | -0.85449800 | -0.55691600 |
|  | N | -2.17712000 | 1.40024500  | -1.06425200 |
|  | N | -1.11276100 | 1.76355300  | -1.82892700 |
|  | N | -0.12180700 | 0.98635800  | -1.65346700 |
|  | N | 3.87235200  | -3.17590600 | 0.13765200  |
|  | N | 2.72190700  | -3.84366600 | 0.43725100  |
|  | N | 1.69121700  | -3.12117900 | 0.25836300  |
|  | N | -0.52014500 | 0.06837900  | -0.75078700 |
|  | N | 2.14833900  | -1.92958700 | -0.17340200 |
|  | C | -1.79977400 | 0.33932300  | -0.40807400 |
|  | C | 3.50296800  | -1.99133000 | -0.24801100 |
|  | C | 4.37606700  | -0.90921700 | -0.67729500 |
|  | C | -2.58646600 | -0.37781200 | 0.57442800  |
|  | N | 5.39922000  | -1.00269100 | -1.46896000 |
|  | N | -2.16858900 | -0.99573700 | 1.63937700  |
|  | N | -3.29019300 | -1.42714700 | 2.28481300  |
|  | N | -4.34441500 | -1.08057500 | 1.67018700  |
|  | N | -3.93990600 | -0.41924100 | 0.56813500  |
|  | N | 4.26501300  | 0.38809000  | -0.28581300 |
|  | N | 5.93129400  | 0.25488100  | -1.54440500 |
|  | N | 5.27503200  | 1.08570000  | -0.84983000 |
|  | N | 3.38017300  | 0.90105500  | 0.59781900  |
|  | N | 2.39828600  | 1.85371000  | -0.06170200 |
|  | N | -4.78283900 | 0.10427500  | -0.35279600 |
|  | N | -5.85039100 | -0.91064000 | -0.68314700 |
|  | O | 2.68375700  | 2.23279400  | -1.14702400 |
|  | O | 1.43203300  | 2.03327800  | 0.61024000  |
|  | O | -5.38367100 | -1.96031200 | -0.98868100 |
|  | O | -6.97273700 | -0.53599200 | -0.62919100 |
|  | N | 4.11836800  | 1.61984600  | 1.70835700  |
|  | N | -5.37339500 | 1.41689700  | 0.10927000  |
|  | O | 5.03776300  | 0.99159300  | 2.11855300  |
|  | O | 3.66143700  | 2.66240800  | 2.03965500  |
|  | O | -6.02716900 | 1.94643000  | -0.72408100 |
|  | O | -5.04046200 | 1.76653800  | 1.19741400  |
|  | N | 0.36970500  | -1.60545100 | -0.53951800 |
|  | N | 1.55383100  | -1.32440600 | -0.71468100 |
|  | N | -2.10934600 | 0.62530300  | -1.52212300 |
|  | N | -1.13375900 | 0.80761900  | -2.44290600 |
|  | N | -0.12476700 | 0.07034600  | -2.20053700 |
|  | N | 4.23295700  | -3.17289400 | 0.41340200  |
|  | N | 3.17154300  | -4.01116200 | 0.62031700  |
|  | N | 2.07566700  | -3.49244500 | 0.24592500  |
|  | N | -0.42951800 | -0.63448400 | -1.09495600 |
|  | N | 2.39565300  | -2.27537300 | -0.24166900 |
|  | C | -1.66787600 | -0.28287200 | -0.69574500 |
|  | C | 3.73343800  | -2.10128800 | -0.11824100 |
|  | C | 4.49954100  | -0.93578300 | -0.55629500 |
|  | C | -2.35958500 | -0.75536100 | 0.48483900  |
|  | N | 5.50815600  | -1.05898600 | -1.36484200 |
|  | N | -1.83337600 | -1.38453800 | 1.49387200  |
|  | N | -2.83498700 | -1.55703700 | 2.39388300  |
|  | N | -3.92334300 | -1.06198000 | 1.98022100  |

II-03

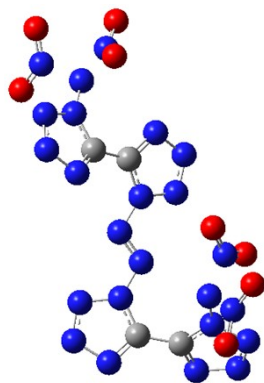

II-04

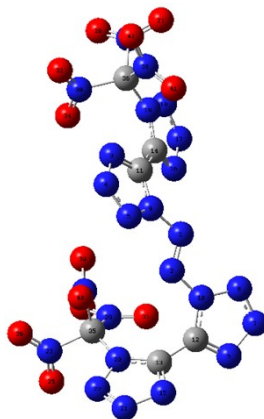

|  |   |             |             |             |
|--|---|-------------|-------------|-------------|
|  | N | -3.67626300 | -0.54516000 | 0.74804900  |
|  | N | 4.39199100  | 0.39019500  | -0.21158800 |
|  | N | 6.01643500  | 0.18502200  | -1.55196400 |
|  | N | 5.37479800  | 1.04934100  | -0.89955800 |
|  | N | 4.08990100  | 2.57916700  | 0.75970800  |
|  | N | -5.98207400 | 0.09813300  | 0.84866900  |
|  | O | 5.03288900  | 2.50588200  | 1.49121100  |
|  | O | 3.56015300  | 3.53409700  | 0.27513800  |
|  | O | -6.56964800 | -0.93810300 | 0.73186200  |
|  | O | -6.25112000 | 1.06463500  | 1.49966700  |
|  | N | 2.93854000  | 0.67999300  | 1.77906800  |
|  | N | -4.28876000 | 1.67559900  | -0.06432900 |
|  | O | 2.90790500  | -0.51988400 | 1.88546800  |
|  | O | 2.59633200  | 1.51063600  | 2.56417500  |
|  | O | -4.86190600 | 2.30525900  | -0.89812600 |
|  | O | -3.48225800 | 2.03619800  | 0.74658200  |
|  | C | 3.44741100  | 1.20770600  | 0.44038900  |
|  | C | -4.66404100 | 0.17055900  | 0.05084900  |
|  | N | 2.21561700  | 1.47971200  | -0.45684300 |
|  | N | -4.97875800 | -0.44078400 | -1.32737100 |
|  | O | 1.15211600  | 1.53580500  | 0.10405200  |
|  | O | 2.47317500  | 1.60944100  | -1.61376300 |
|  | O | -4.26352100 | -1.34035800 | -1.67812100 |
|  | O | -5.92814300 | 0.02790700  | -1.88144300 |
|  | N | 0.78165100  | 0.31075500  | 0.41214100  |
|  | N | -0.44021500 | 0.21122200  | 0.35507500  |
|  | N | 2.51081400  | 3.30324000  | 0.20697700  |
|  | N | 1.20940500  | 3.69877000  | 0.28374000  |
|  | N | 0.41407100  | 2.70787000  | 0.33463400  |
|  | N | -2.16363500 | -2.77359200 | 0.69856200  |
|  | N | -0.88981700 | -3.10666000 | 1.04511700  |
|  | N | -0.09588300 | -2.11819100 | 0.94177800  |
|  | N | 1.19272600  | 1.60766600  | 0.29280600  |
|  | N | -0.84874900 | -1.08367600 | 0.51722900  |
|  | C | 2.48831800  | 2.00262400  | 0.22025800  |
|  | C | -2.12726300 | -1.51182900 | 0.38157100  |
|  | C | -3.23726100 | -0.69355400 | -0.08410200 |
|  | C | 3.63899100  | 1.11504100  | 0.14458100  |
|  | N | -4.46793100 | -0.81701000 | 0.36648100  |
|  | N | 3.63939500  | -0.04086500 | -0.48600800 |
|  | N | 5.62064600  | 0.41708600  | 0.42755800  |
|  | N | 4.84624900  | 1.40730500  | 0.70604000  |
|  | N | -3.12744400 | 0.25228000  | -1.05920800 |
|  | N | -4.30998700 | 0.73459800  | -1.22881200 |
|  | N | -5.07187700 | 0.07976200  | -0.37109800 |
|  | N | 4.87551700  | -0.41725900 | -0.27687100 |
|  | N | -6.51287600 | 0.34669000  | -0.25323500 |
|  | N | 5.40283000  | -1.68719000 | -0.79178200 |
|  | O | -7.05418300 | -0.29293000 | 0.58660900  |
|  | O | -6.91476400 | 1.16214500  | -1.01660600 |
|  | O | 4.61786200  | -2.31401400 | -1.42396900 |
|  | O | 6.53471700  | -1.89311200 | -0.49875000 |

II-05

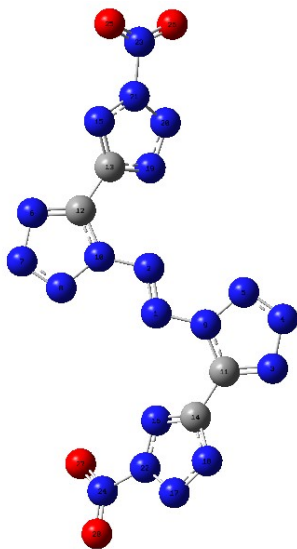

II-06

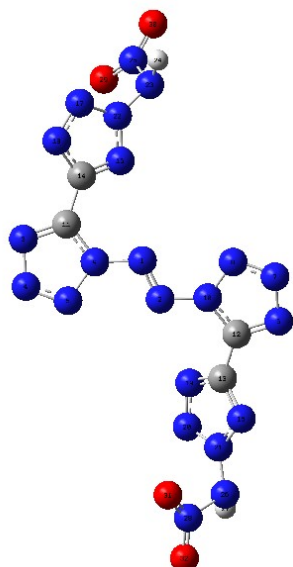

|   |             |             |             |
|---|-------------|-------------|-------------|
| N | -0.65344000 | -0.24848600 | 0.57559700  |
| N | 0.54400900  | -0.03206000 | 0.41460600  |
| N | -2.14410100 | -3.34692400 | 0.16960500  |
| N | -0.81293100 | -3.62717300 | 0.09838500  |
| N | -0.10060200 | -2.57885300 | 0.19692900  |
| N | 2.05326500  | 3.04025600  | 0.94131100  |
| N | 0.80354400  | 3.21578000  | 1.45086300  |
| N | 0.08270200  | 2.17688800  | 1.30979600  |
| N | -0.96878500 | -1.55635200 | 0.34225900  |
| N | 0.86363300  | 1.26873100  | 0.69117300  |
| C | -2.22898000 | -2.05820900 | 0.32847000  |
| C | 2.08205800  | 1.82275700  | 0.48034000  |
| C | 3.19390100  | 1.16317500  | -0.18759300 |
| C | -3.45235200 | -1.27893400 | 0.43918400  |
| N | 4.45211100  | 1.34275400  | 0.14969900  |
| N | -3.59042900 | -0.04835500 | -0.00510600 |
| N | -5.46725800 | -0.83108200 | 0.89638700  |
| N | -4.59440600 | -1.76640200 | 0.99909500  |
| N | 3.04951000  | 0.32939700  | -1.25438800 |
| N | 4.23574400  | -0.03244100 | -1.58770400 |
| N | 5.05407100  | 0.59257600  | -0.74745800 |
| N | -4.84575000 | 0.18723100  | 0.30857500  |
| N | -5.47093300 | 1.34891800  | -0.02471600 |
| H | -6.07431100 | 1.68595200  | 0.72304400  |
| N | -6.29606100 | 1.20248100  | -1.20654700 |
| N | 6.40373800  | 0.41472400  | -0.75685900 |
| H | 6.78111200  | 0.42308200  | -1.70261000 |
| N | 6.79028000  | -0.84674000 | -0.15673900 |
| O | -6.00138500 | 0.32298100  | -1.95804500 |
| O | -7.14913400 | 2.03924700  | -1.29457900 |
| O | 6.02675300  | -1.32122000 | 0.62795500  |
| O | 7.87502100  | -1.22048400 | -0.50235400 |

II-07

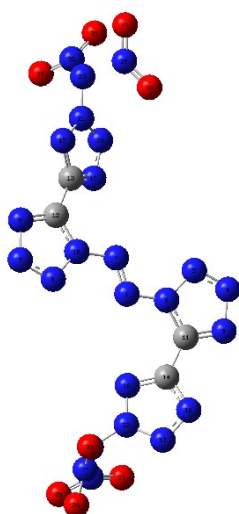

|   |             |             |             |
|---|-------------|-------------|-------------|
| N | 0.75119800  | 0.44976200  | 0.40711400  |
| N | -0.44753100 | 0.19131400  | 0.35502400  |
| N | 2.07372100  | 3.63081600  | 0.05220100  |
| N | 0.72957200  | 3.85001600  | 0.06853500  |
| N | 0.07264200  | 2.76614800  | 0.16797800  |
| N | -1.77666700 | -2.96923800 | 0.84753500  |
| N | -0.45900000 | -3.13437900 | 1.14758400  |
| N | 0.20231900  | -2.05944600 | 0.98928200  |
| N | 0.99254100  | 1.78088700  | 0.22229300  |
| N | -0.68791300 | -1.13690300 | 0.57264100  |
| C | 2.22578700  | 2.34279000  | 0.15356100  |
| C | -1.90832200 | -1.72230100 | 0.49865000  |
| C | -3.13144400 | -1.05997400 | 0.07035500  |
| C | 3.49056000  | 1.62443400  | 0.17454600  |
| N | -4.31493800 | -1.34544600 | 0.55965000  |
| N | 3.66370200  | 0.40617800  | -0.28139600 |
| N | 5.55304000  | 1.28844500  | 0.51649200  |
| N | 4.64226600  | 2.17104900  | 0.67130700  |
| N | -3.18143000 | -0.10920500 | -0.91124100 |
| N | -4.41119200 | 0.21966200  | -1.03132700 |
| N | -5.07279800 | -0.53362500 | -0.15276000 |
| N | 4.95242200  | 0.23951100  | -0.04845400 |
| N | 5.59700100  | -0.90061400 | -0.39233500 |
| N | 6.45102600  | -0.71128400 | -1.62373500 |
| N | -6.40976500 | -0.44529000 | 0.05337000  |

II-08

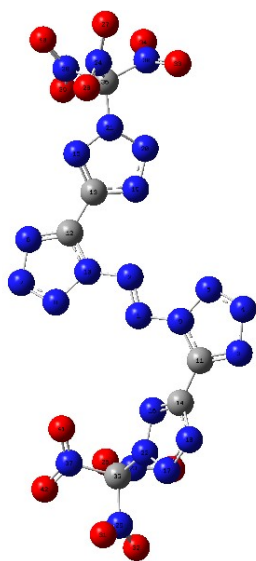

|   |             |             |             |
|---|-------------|-------------|-------------|
| N | -6.76745600 | 0.79464700  | 0.84286400  |
| O | 6.47290900  | 0.39371900  | -2.06663500 |
| O | 6.91969600  | -1.72540600 | -2.01964300 |
| O | -7.91281900 | 0.83366800  | 1.14411600  |
| O | -5.85361800 | 1.50665700  | 1.11660500  |
| N | 6.40910300  | -1.38769000 | 0.78734100  |
| N | -7.11781100 | -0.48031500 | -1.28157600 |
| O | 5.77064900  | -1.40343900 | 1.78811300  |
| O | 7.52597400  | -1.71091300 | 0.56079900  |
| O | -7.93758800 | 0.35497700  | -1.46521200 |
| O | -6.75618400 | -1.39109900 | -1.95206800 |
| N | 0.96659100  | 0.81749800  | 0.51628800  |
| N | -0.23267000 | 0.57177700  | 0.43038400  |
| N | 2.34854400  | 3.96717900  | 0.11201200  |
| N | 1.00837400  | 4.21014500  | 0.09913600  |
| N | 0.33063300  | 3.14014600  | 0.21459700  |
| N | -1.61252100 | -2.56598900 | 0.92584900  |
| N | -0.30791500 | -2.74001900 | 1.27585200  |
| N | 0.36972300  | -1.67397600 | 1.12732800  |
| N | 1.23087900  | 2.14150800  | 0.31070300  |
| N | -0.49549200 | -0.74828500 | 0.66695400  |
| C | 2.47425500  | 2.68011700  | 0.24915400  |
| C | -1.71780500 | -1.32339500 | 0.55589800  |
| C | -2.91735200 | -0.65792600 | 0.06877900  |
| C | 3.72118700  | 1.93305600  | 0.30908900  |
| N | -4.11842800 | -0.90808800 | 0.52960300  |
| N | 3.88029600  | 0.72086800  | -0.16334400 |
| N | 5.76029200  | 1.53160300  | 0.72892500  |
| N | 4.86924100  | 2.43616300  | 0.85382100  |
| N | -2.92682900 | 0.25673400  | -0.94639800 |
| N | -4.14572100 | 0.58884100  | -1.12889600 |
| N | -4.84973800 | -0.10193600 | -0.22164800 |
| N | 5.15040000  | 0.49843900  | 0.12913000  |
| N | 5.55519100  | -0.92642900 | -1.76488000 |
| N | -6.83454700 | 0.38588400  | 1.16257600  |
| O | 5.66936400  | 0.05198900  | -2.42399500 |
| O | 5.29291800  | -2.03251800 | -2.09653700 |
| O | -7.99156000 | 0.69362700  | 1.11061700  |
| O | -6.07920500 | 0.40826900  | 2.09199000  |
| N | 7.29655700  | -0.60736500 | 0.01011600  |
| N | -6.83693000 | 0.79217900  | -1.25750700 |
| O | 7.57327200  | -0.59317100 | 1.16472100  |
| O | 8.00437500  | -0.57898300 | -0.94146000 |
| O | -6.65147700 | 1.95769900  | -1.05270100 |
| O | -7.40332700 | 0.25176000  | -2.16227400 |
| C | 5.79172900  | -0.69560600 | -0.25887400 |
| C | -6.25924000 | -0.12150000 | -0.16941500 |
| N | 5.29234900  | -1.93318200 | 0.50384400  |
| N | -6.75576900 | -1.56605200 | -0.40596300 |
| O | -6.14574000 | -2.15163000 | -1.25395200 |
| O | -7.67942500 | -1.93043400 | 0.26202100  |
| O | 4.23903400  | -1.83119400 | 1.02821600  |
| O | 6.02749600  | -2.85815900 | 0.46246200  |

## Part II Experimental study details

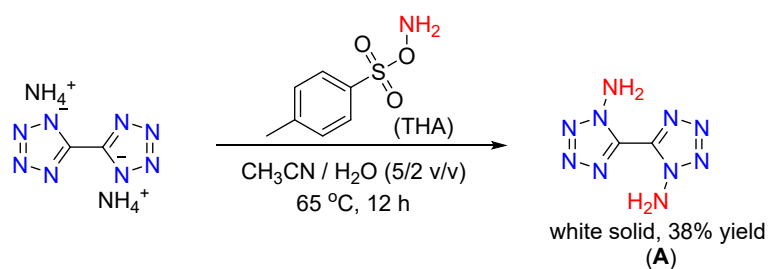

A magnetic stir bar was placed in a dried 50 mL round-bottom flask, followed by the addition of 120 mg (0.7 mmol) of 5,5'-diazomethane disodium salt. Then, 25 mL of acetonitrile, 10 mL of water and a pre-prepared dichloromethane solution of THA were introduced successively. The reaction mixture was stirred at room temperature for 12 h and the progress was monitored by TLC using EA as the eluent. After completion, acetonitrile was removed under reduced pressure. The aqueous phase was extracted repeatedly with ethyl acetate (monitored by TLC until complete extraction). The combined organic extracts were dried over anhydrous  $\text{Na}_2\text{SO}_4$ , filtered and concentrated to afford a pale-yellow crude solid. The product was further purified by silica gel column chromatography with a mixture of PE and EA (4/3 v/v) as the eluent. Finally, 44.9 mg of the derivative **A** was obtained, yielding 38%.

### 1,1'-Diamino-5,5'-biquinolizole (A):

$^1\text{H NMR}$  (500 MHz,  $\text{DMSO-}d_6$ )  $\delta$  7.44 (s, 4H) ppm.

$^{13}\text{C NMR}$  (126 MHz,  $\text{DMSO-}d_6$ )  $\delta$  141.2 ppm.

**IR** (KBr): 3342.22, 3233.35, 3163.38, 2920.31, 2849.72, 1615.35, 1587.11, 1388.24, 1266.70, 1129.21, 1031.00, 993.55, 921.13, 895.35, 713.04, 705.49, 689.72, 666.39, 463.22  $\text{cm}^{-1}$ .

**Elemental analysis**  $\text{C}_2\text{H}_4\text{N}_{10}$  (168.06) Calculated values: C 14.29, H 2.40, N 83.31%, Measured values: C 13.89, H 4.56, N 81.55%.

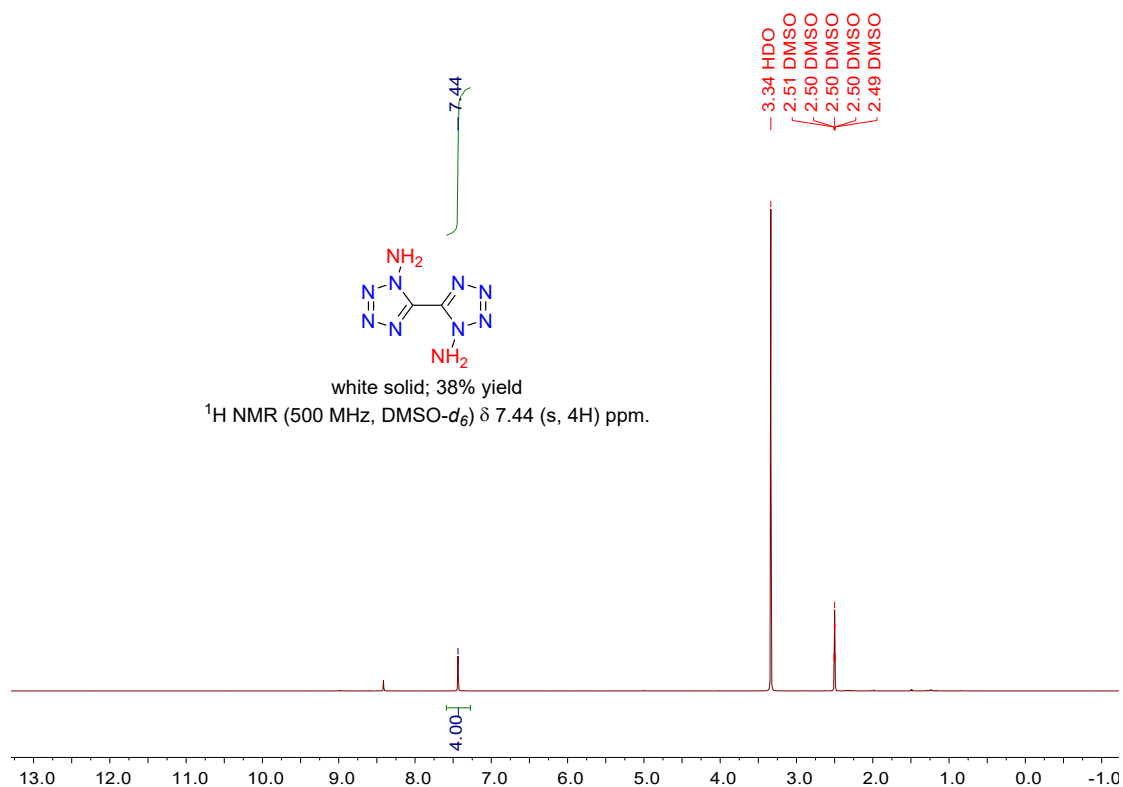

Fig. S8  $^1\text{H}$  NMR (DMSO- $d_6$ , 500 MHz) map of derivative A

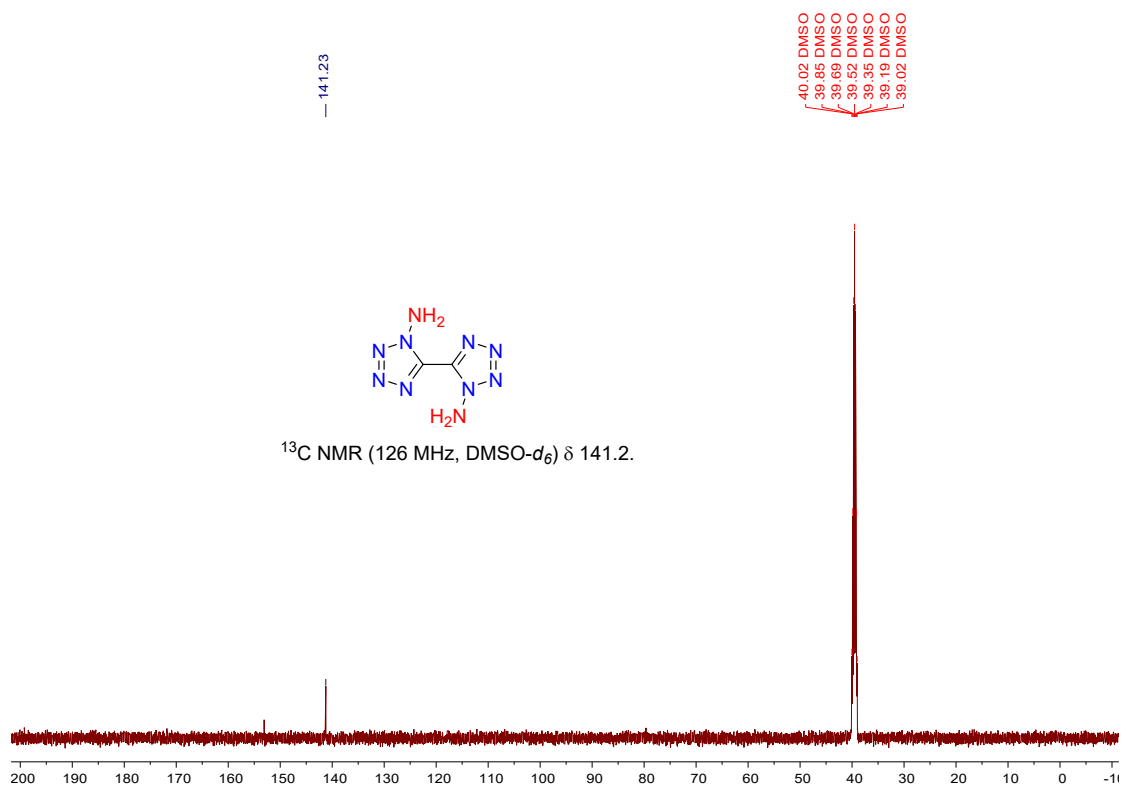

Fig. S9  $^{13}\text{C}$  NMR (DMSO- $d_6$ , 126 MHz) map of derivative A

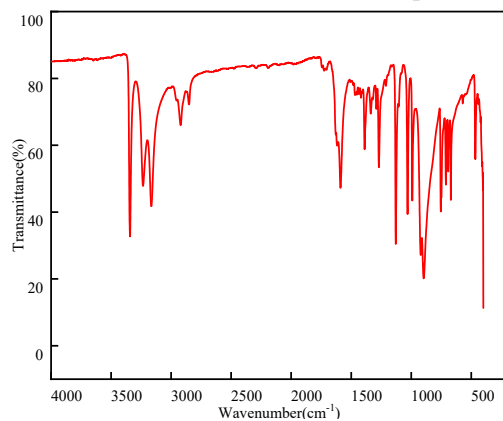

Fig. S10 IR map of derivative A

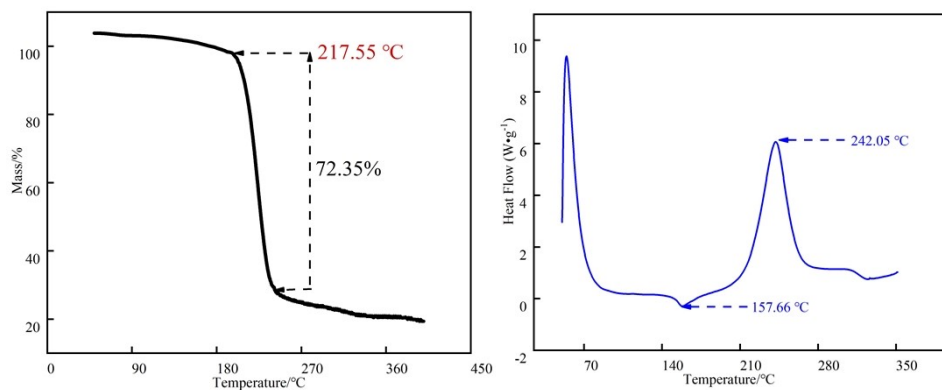

Fig. S11 TG map (left) and DSC map (right) of derivative A

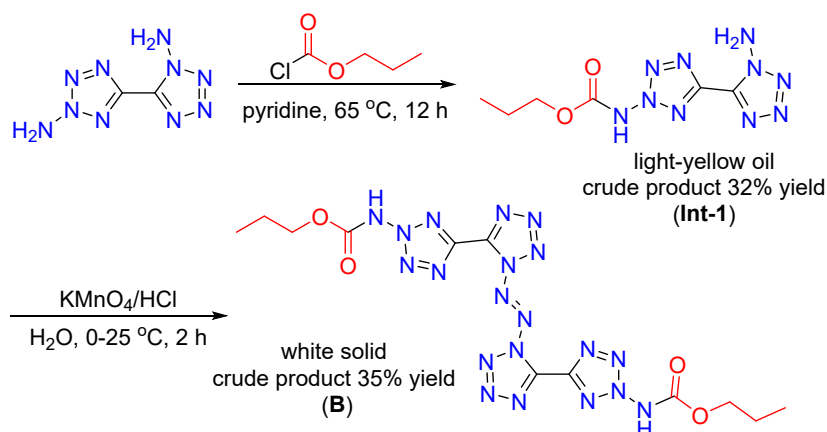

Under a  $\text{N}_2$  atmosphere at 65 °C, 0.60 g (3.5 mmol) of 1,2-diamino-5,5'-bistetrazole was dissolved in 5 mL of pyridine. Then 0.96 g (7.9 mmol) of propyl chloroformate was added. The reaction was maintained under the same conditions for 12 h. After completion, the solvent was removed under reduced pressure. The crude product was purified by silica gel column chromatography using a mixture of PE and EA (3/2 v/v) as the eluent, affording a light-yellow oil intermediate (**Int-1**, crude product 32% yield). At 0 °C, this light-yellow oil intermediate (180 g, 0.7 mmol) was added to 5 mL of HCl, followed by the addition of  $\text{KMnO}_4$  (0.33 g, 2.1 mmol). The reaction mixture was then warmed to 25 °C and stirred for 2 h. The reaction was quenched by adding an aqueous solution of  $\text{H}_2\text{O}_2$ , resulting in the precipitation of a white solid, which corresponded to the desire product (derivative **B**). The crude product (35% yield) was collected by filtration and further purified by recrystallization from methanol to yield the pure final product.

propyl (1-amino-1*H*,2'*H*-[5,5'-bitetrazol]-2'-yl)carbamate (**Int-1**)

$^{13}\text{C}$  NMR (126 MHz,  $\text{DMSO}-d_6$ )  $\delta$  152.0, 143.3, 68.8, 22.0, 10.4 ppm.

dipropyl (diazene-1,2-diylbis((1*H*,2'*H*-[5,5'-bitetrazole]-1,2'-diyl)))(*E*)-dicarbamate (**B**)

$^1\text{H}$  NMR (500 MHz,  $\text{DMSO}-d_6$ )  $\delta$  4.16 (t,  $J = 6.43$  Hz, 4H), 2.54 (s, 2H), 1.64 (q,  $J = 7.28$  Hz, 4H), 0.90 (t,  $J = 7.34$  Hz, 6H).

$^{13}\text{C}$  NMR (126 MHz,  $\text{DMSO}-d_6$ )  $\delta$  162.4, 156.4, 153.5, 68.4, 21.5, 9.9 ppm.

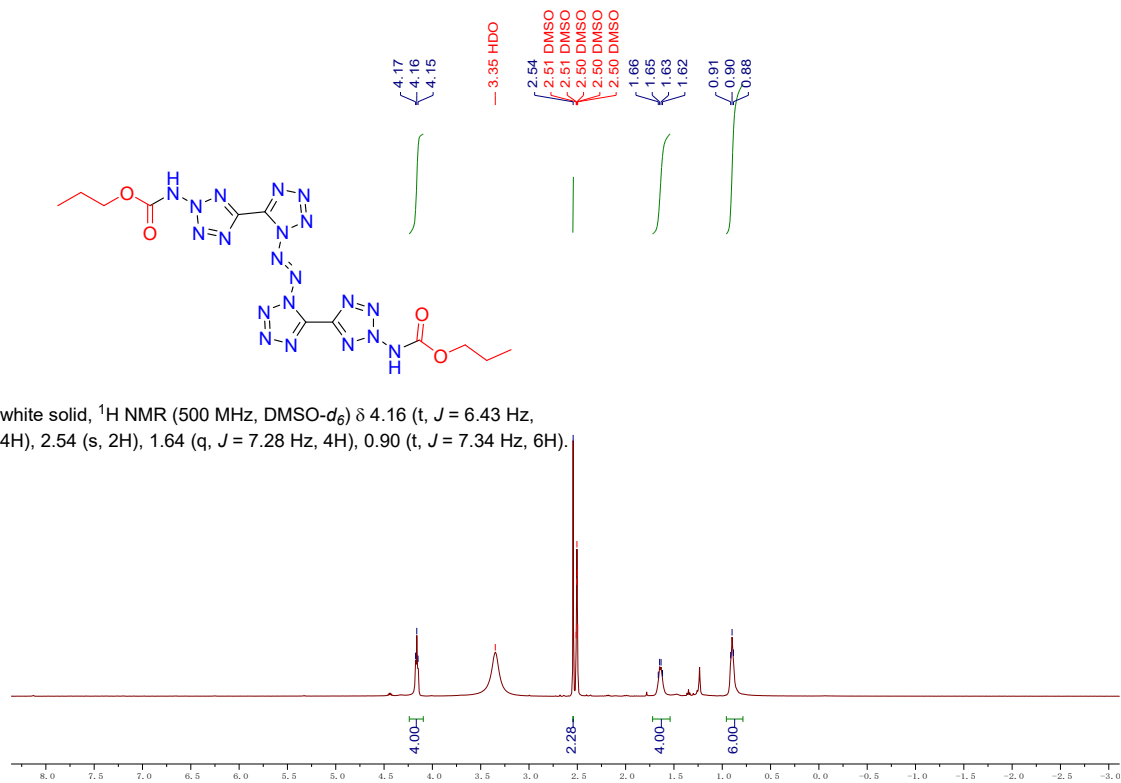

Fig. S12  $^1\text{H}$  NMR ( $\text{DMSO}-d_6$ , 500 MHz) map of derivative **B**

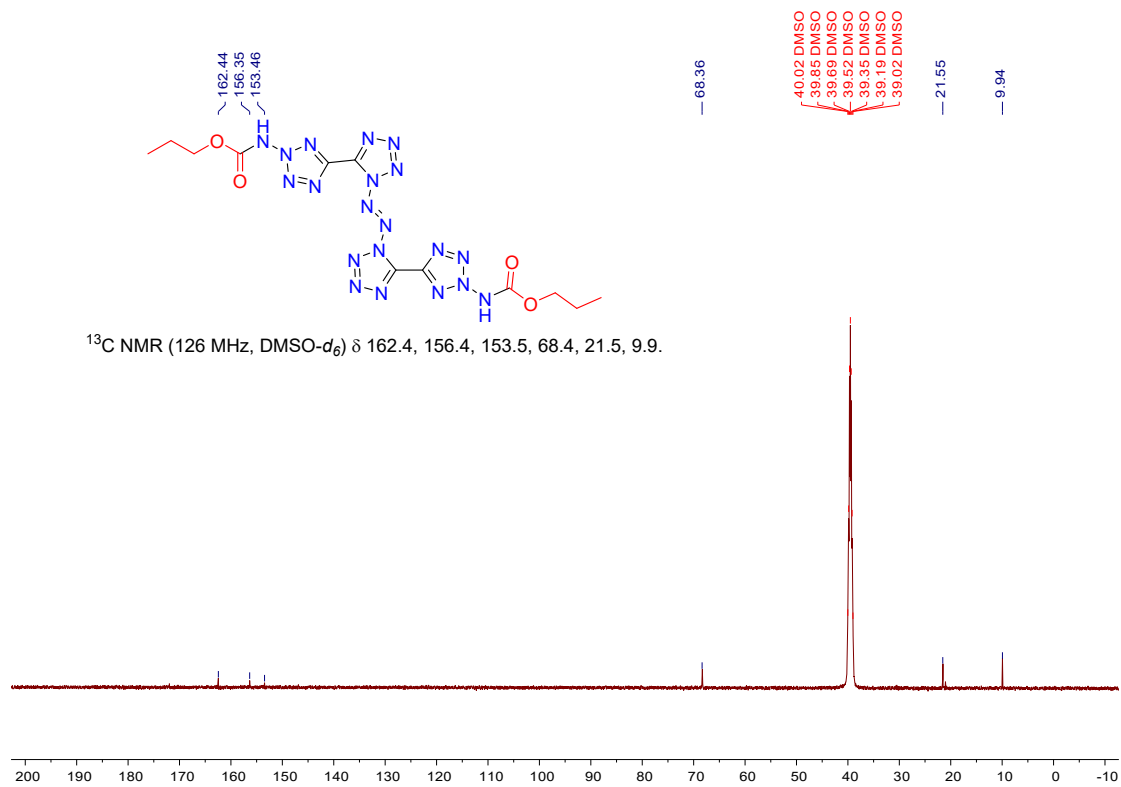

Fig. S13  $^{13}\text{C}$  NMR ( $\text{DMSO}-d_6$ , 126 MHz) map of derivative **B**

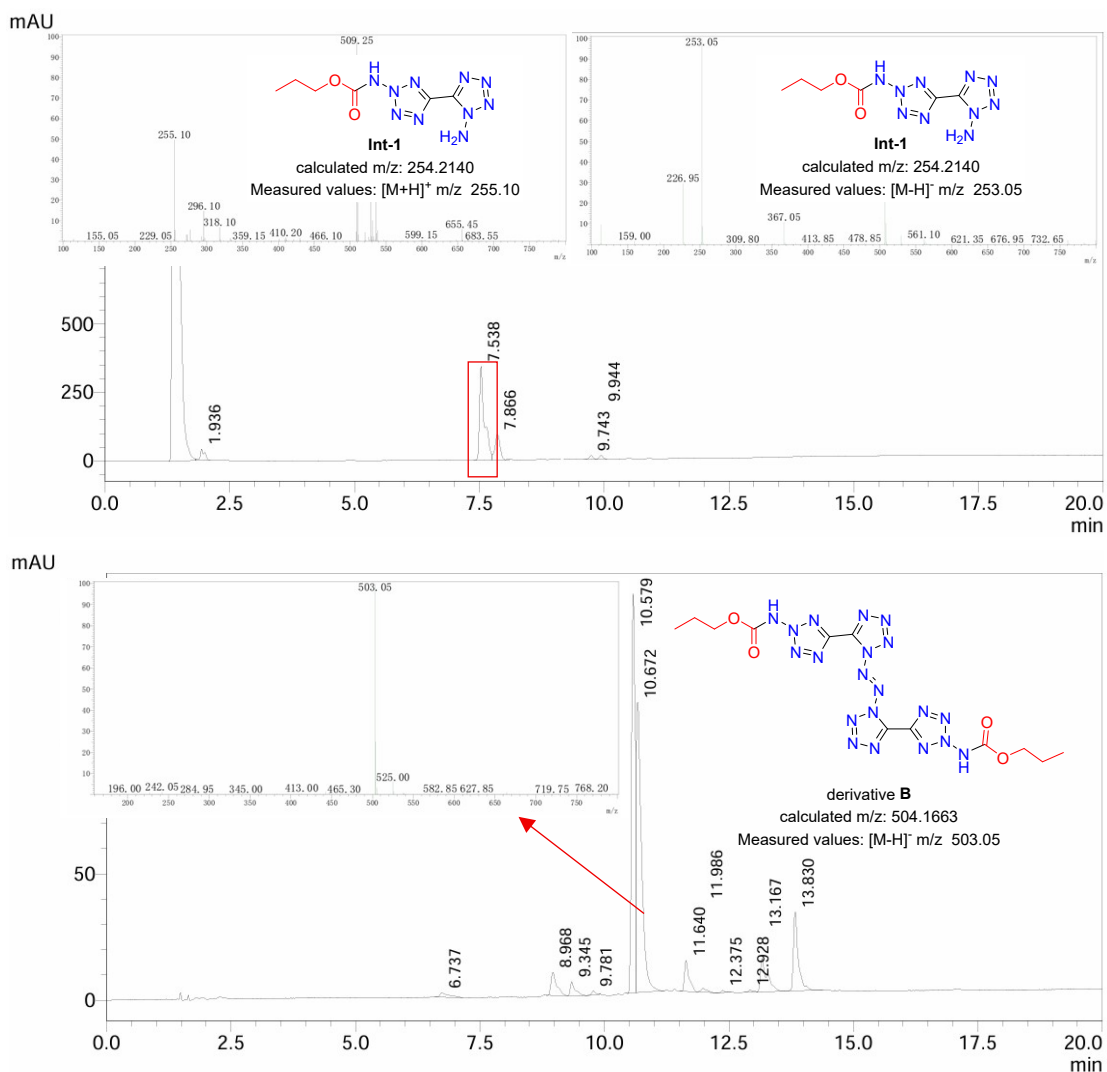

Fig. S14 LC-MS analysis of **Int-1** and derivative **B**

### Part III X-ray diffraction analysis details

Table S7 Crystal data and structure refinement for derivative **A**

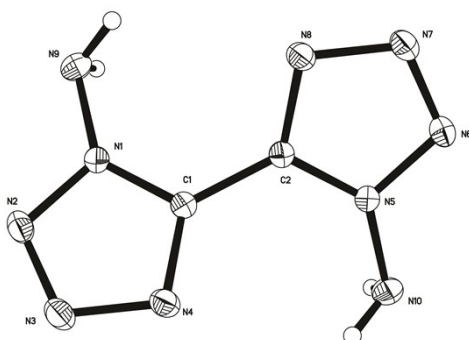

|                        |                                               |
|------------------------|-----------------------------------------------|
| CCDC deposition number | 2538870                                       |
| Empirical formula      | C <sub>2</sub> H <sub>4</sub> N <sub>10</sub> |
| Formula weight         | 168.15                                        |
| Temperature            | 296(2) K                                      |

|                                   |                                             |                  |
|-----------------------------------|---------------------------------------------|------------------|
| Wavelength                        | 0.71073 Å                                   |                  |
| Crystal system                    | Monoclinic                                  |                  |
| Space group                       | P2 <sub>1</sub> /n                          |                  |
| Unit cell dimensions              | a = 6.2039(4) Å                             | α = 90°.         |
|                                   | b = 10.1051(6) Å                            | β = 104.096(2)°. |
|                                   | c = 10.3445(6) Å                            | γ = 90°.         |
| Volume                            | 628.98(7) Å <sup>3</sup>                    |                  |
| Z                                 | 4                                           |                  |
| Density (calculated)              | 1.776 Mg/m <sup>3</sup>                     |                  |
| Absorption coefficient            | 0.141 mm <sup>-1</sup>                      |                  |
| F(000)                            | 344                                         |                  |
| Crystal size                      | 0.250 x 0.100 x 0.080 mm <sup>3</sup>       |                  |
| Theta range for data collection   | 2.861 to 27.500°.                           |                  |
| Index ranges                      | -8 ≤ h ≤ 7, -12 ≤ k ≤ 13, -11 ≤ l ≤ 13      |                  |
| Reflections collected             | 6110                                        |                  |
| Independent reflections           | 1425 [R(int) = 0.0249]                      |                  |
| Completeness to theta = 25.242°   | 98.9 %                                      |                  |
| Absorption correction             | Semi-empirical from equivalents             |                  |
| Max. and min. transmission        | 0.7456 and 0.6760                           |                  |
| Refinement method                 | Full-matrix least-squares on F <sup>2</sup> |                  |
| Data / restraints / parameters    | 1425 / 0 / 121                              |                  |
| Goodness-of-fit on F <sup>2</sup> | 1.072                                       |                  |
| Final R indices [I > 2σ(I)]       | R1 = 0.0337, wR2 = 0.0849                   |                  |
| R indices (all data)              | R1 = 0.0377, wR2 = 0.0882                   |                  |
| Extinction coefficient            | n/a                                         |                  |
| Largest diff. peak and hole       | 0.280 and -0.196 e.Å <sup>-3</sup>          |                  |

Table S8 Bond lengths [Å] and angles [°] for derivative A

| Bond lengths [Å] |            | Angles [°]     |            |
|------------------|------------|----------------|------------|
| C(1)-N(4)        | 1.3179(14) | N(4)-C(1)-N(1) | 108.97(10) |
| C(1)-N(1)        | 1.3409(14) | N(4)-C(1)-C(2) | 126.37(10) |
| C(1)-C(2)        | 1.4516(15) | N(1)-C(1)-C(2) | 124.54(10) |
| C(2)-N(8)        | 1.3186(14) | N(8)-C(2)-N(5) | 108.89(9)  |
| C(2)-N(5)        | 1.3407(14) | N(8)-C(2)-C(1) | 126.03(10) |
| N(1)-N(2)        | 1.3385(14) | N(5)-C(2)-C(1) | 124.96(10) |
| N(1)-N(9)        | 1.3902(14) | N(2)-N(1)-C(1) | 108.18(9)  |
| N(2)-N(3)        | 1.2936(15) | N(2)-N(1)-N(9) | 119.06(9)  |
| N(3)-N(4)        | 1.3619(14) | C(1)-N(1)-N(9) | 132.76(10) |
| N(5)-N(6)        | 1.3387(13) | N(3)-N(2)-N(1) | 106.73(9)  |

|              |            |                     |            |
|--------------|------------|---------------------|------------|
| N(5)-N(10)   | 1.3903(14) | N(2)-N(3)-N(4)      | 110.87(9)  |
| N(6)-N(7)    | 1.2936(14) | C(1)-N(4)-N(3)      | 105.24(9)  |
| N(7)-N(8)    | 1.3602(13) | N(6)-N(5)-C(2)      | 108.25(9)  |
| N(9)-H(9A)   | 0.911(18)  | N(6)-N(5)-N(10)     | 118.76(9)  |
| N(9)-H(9B)   | 0.871(18)  | C(2)-N(5)-N(10)     | 132.99(10) |
| N(10)-H(10A) | 0.903(19)  | N(7)-N(6)-N(5)      | 106.63(9)  |
| N(10)-H(10B) | 0.864(19)  | N(6)-N(7)-N(8)      | 110.97(9)  |
|              |            | C(2)-N(8)-N(7)      | 105.26(9)  |
|              |            | N(1)-N(9)-H(9A)     | 106.5(11)  |
|              |            | N(1)-N(9)-H(9B)     | 107.9(11)  |
|              |            | H(9A)-N(9)-H(9B)    | 109.5(16)  |
|              |            | N(5)-N(10)-H(10A)   | 107.9(11)  |
|              |            | N(5)-N(10)-H(10B)   | 108.3(12)  |
|              |            | H(10A)-N(10)-H(10B) | 110.7(17)  |

Table S9 Hydrogen bonds for derivative A [ $\text{\AA}$  and  $^\circ$ ]

| D-H...A               | d(D-H)    | d(H...A)  | d(D...A)   | $\angle(\text{DHA})$ |
|-----------------------|-----------|-----------|------------|----------------------|
| N(10)-H(10B)...N(8)#1 | 0.864(19) | 2.552(19) | 3.2050(16) | 133.1(14)            |
| N(10)-H(10B)...N(4)   | 0.864(19) | 2.634(18) | 3.2070(15) | 124.9(14)            |
| N(10)-H(10A)...N(9)#2 | 0.903(19) | 2.302(19) | 3.1629(16) | 159.3(15)            |
| N(9)-H(9B)...N(10)#3  | 0.871(18) | 2.581(18) | 3.2909(16) | 139.2(14)            |
| N(9)-H(9B)...N(7)#4   | 0.871(18) | 2.423(18) | 3.1081(15) | 135.8(14)            |
| N(9)-H(9A)...N(8)     | 0.911(18) | 2.597(17) | 3.1828(15) | 122.8(13)            |
| N(9)-H(9A)...N(4)#5   | 0.911(18) | 2.492(18) | 3.1653(15) | 131.0(14)            |

## Part IV Calculation process of the HOFs for derivative A and B

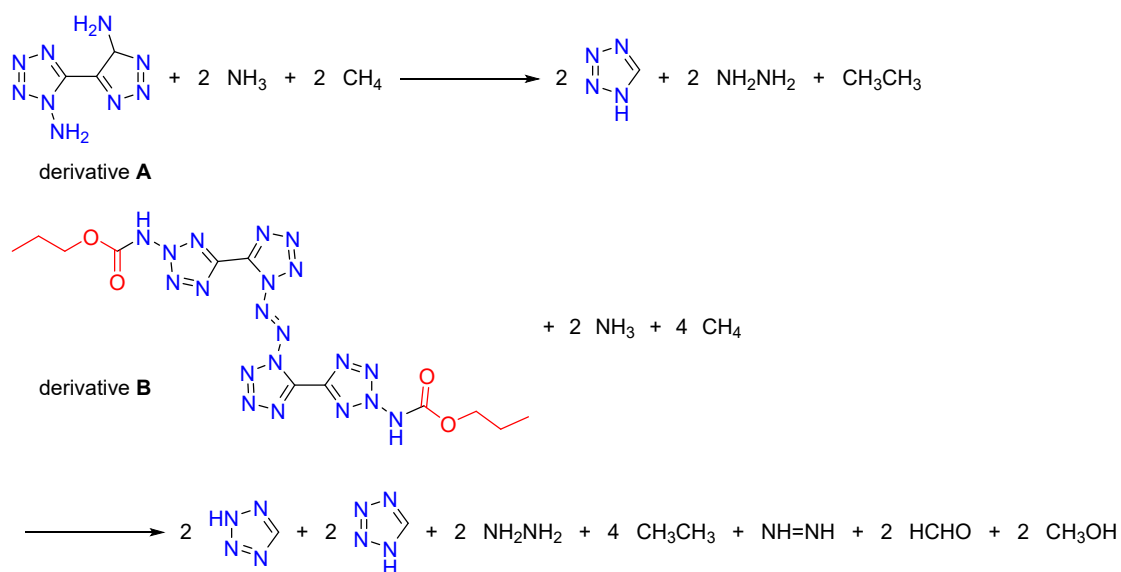

Fig. S15 Isodesmic reactions of derivative **A** and **B**

Table S10 Density of derivative **A** and **B** (at M06-2X/6-311g+(2d,p) level)

| No.      | Volume <sup>a</sup> | Density <sup>b</sup> | overall surface area <sup>c</sup> | $v\sigma_{tot}^2$ <sup>d</sup> | $\rho$ <sup>e</sup> | $\Delta H_{vap}$ <sup>f</sup> | $\Delta H_{sub}$ <sup>g</sup> | $T_{bp}$ <sup>h</sup> |
|----------|---------------------|----------------------|-----------------------------------|--------------------------------|---------------------|-------------------------------|-------------------------------|-----------------------|
| <b>A</b> | 174.4               | 1.6008               | 177.5                             | 55.98                          | 1.671               | 17.50                         | 99.19                         | 662.9                 |
| <b>B</b> | 536.3               | 1.5616               | 498.4                             | 160.5                          | 1.928               | 41.49                         | 377.0                         | 1714                  |

<sup>a</sup> Angstrom<sup>3</sup>; <sup>b</sup> Estimated density according to mass and volume, g/cm<sup>3</sup>; <sup>c</sup> Angstrom<sup>2</sup>; <sup>d</sup> Product of  $\sigma_{tot}^2$  and nu, (kcal/mol)<sup>2</sup>; <sup>e</sup>  $\Delta H_{vap} = a\sqrt{A} + b\sqrt{v\sigma_{tot}^2} + c$  (kcal/mol),  $a = 2.130$ ,  $b = 0.930$ ,  $c = -17.844$  (ref: *J. Phys. Chem. A*, 2006, **110**(3), 1005-1013.); <sup>g</sup>  $\Delta H_{sub} = aA^2 + b\sqrt{v\sigma_{tot}^2} + c$  (kJ/mol),  $a = 0.000267$ ,  $b = 1.650087$ ,  $c = 2.966078$ ; <sup>h</sup>  $T_{bp} = \alpha A + \beta\sqrt{v\sigma_{tot}^2} + \gamma$  (K),  $\alpha = 2.736$ ,  $\beta = 33.31$ ,  $\gamma = -72.05$  (ref: *J. Phys. Chem.* 1993, **97**(37), 9369-9373.)

Table S11 Detonation properties of derivative **A** and **B** (at M06-2X/6-311g+(2d,p) level)

| No.      | $\rho$ <sup>a</sup> | $\Delta H_{fb}^0$ <sup>b</sup> | OB% <sup>c</sup> | $Q$ <sup>d</sup> | $D$ <sup>e</sup> | $P$ <sup>f</sup> | $h_{50g}$ <sup>g</sup> |
|----------|---------------------|--------------------------------|------------------|------------------|------------------|------------------|------------------------|
| <b>A</b> | 1.6008              | 800.9                          | 38.07            | 5295             | 8.170            | 29.41            | 47.66                  |
| <b>B</b> | 1.5616              | 534.2                          | -38.08           | 3333             | 6.730            | 19.82            | 52.90                  |

<sup>a</sup> density (g/cm<sup>3</sup>); <sup>b</sup> solid phase heat of formation (kJ/mol); <sup>c</sup> oxygen balance; <sup>d</sup> explosion heat (J/g); <sup>e</sup> detonation velocity (km/s); <sup>f</sup> explosion pressure (GPa); <sup>g</sup> impact sensitivity (cm).
